# Supplementary material for: A noncanonical chaperone interacts with drug efflux pumps during their assembly into bacterial outer membranes
Source: PubMed Central journal article supplement (PMC8809574; doi:10.1371/journal.pbio.3001523), 2022-01-21

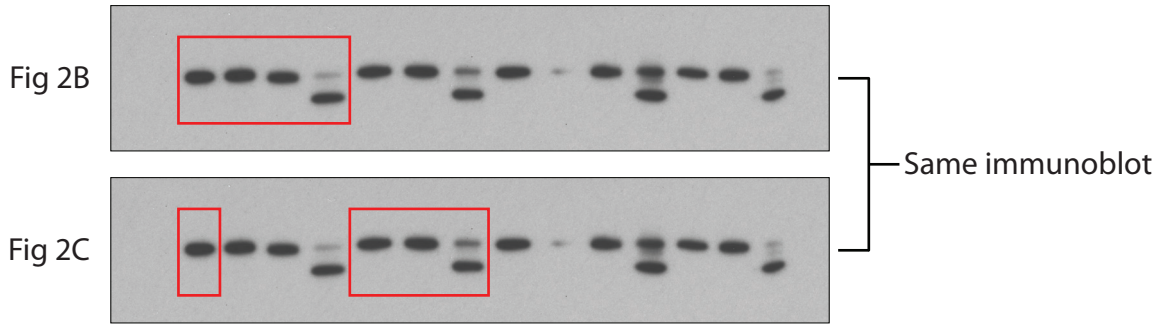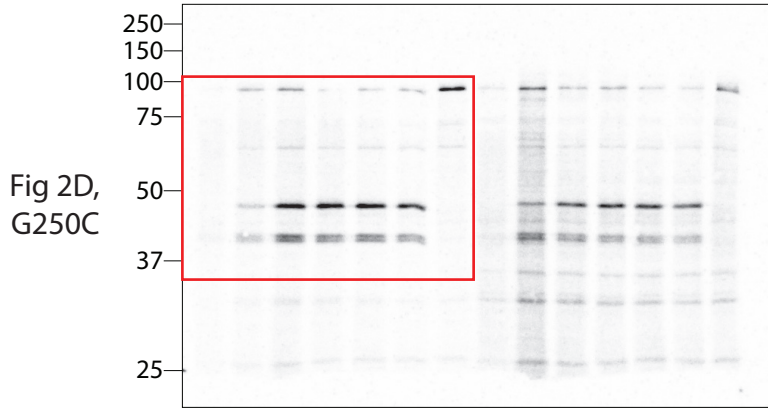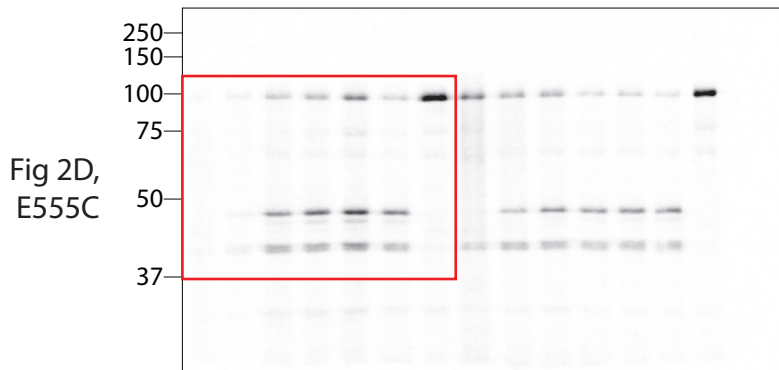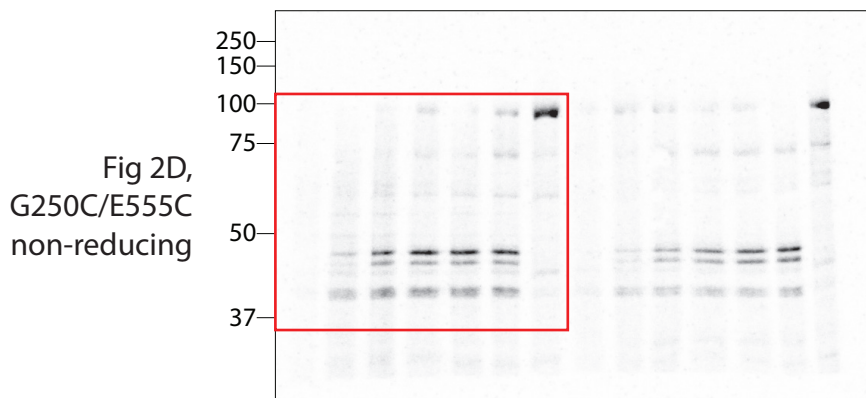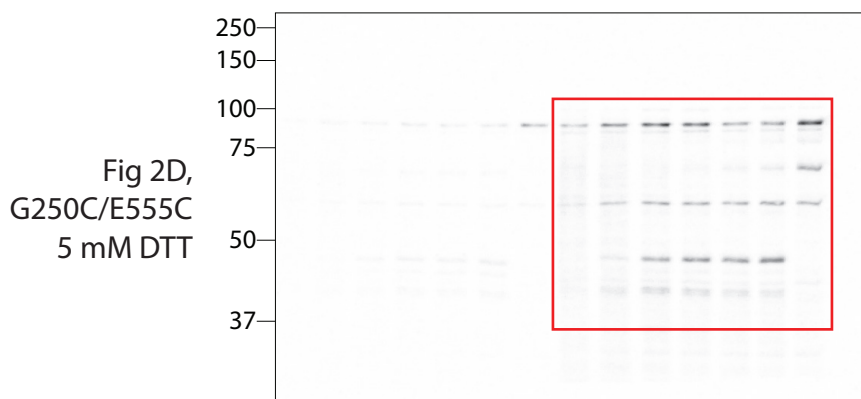

Fig 2E,  
G252C

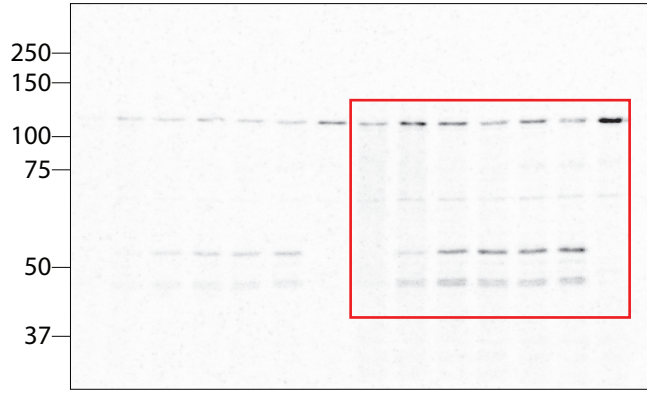

Fig 2E,  
G553C

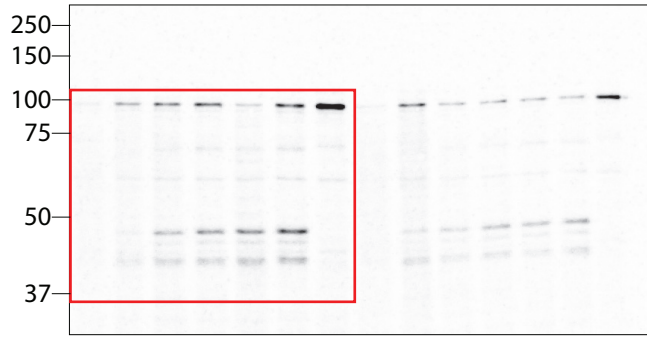

Fig 2E,  
G252C/G553C  
non-reducing

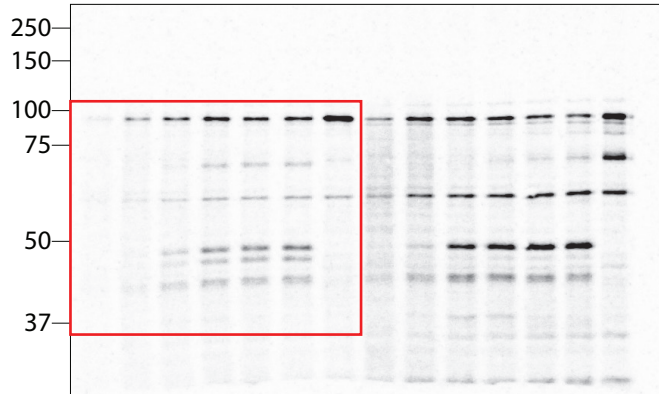

Fig 2E,  
G252C/G553C  
5 mM DTT

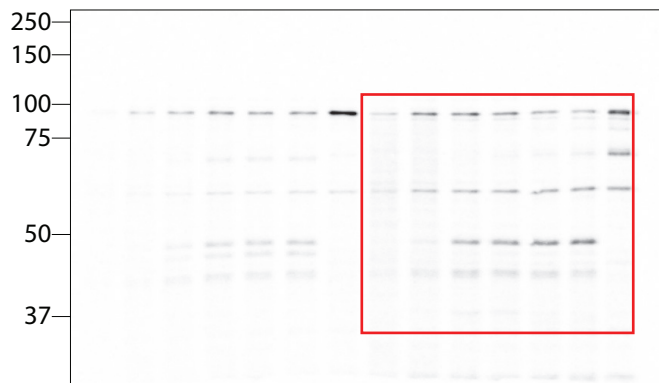

Fig 3C,  
top panel  
 $\alpha$ TamA

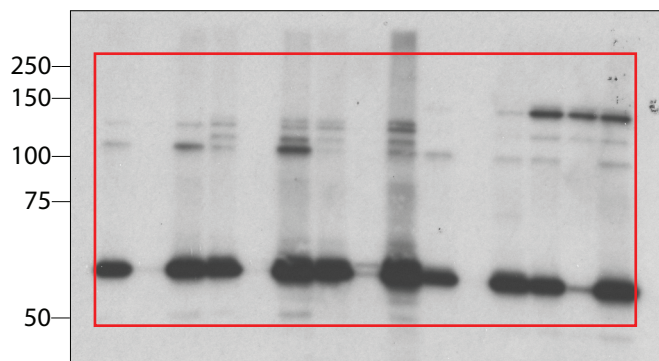

Same autoradiograph

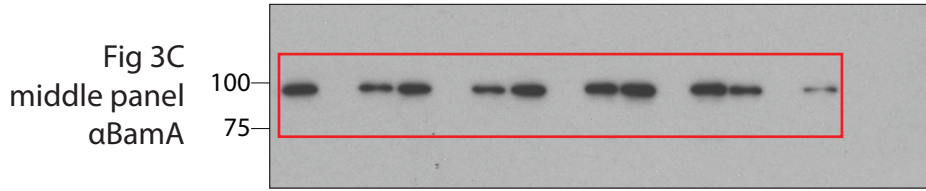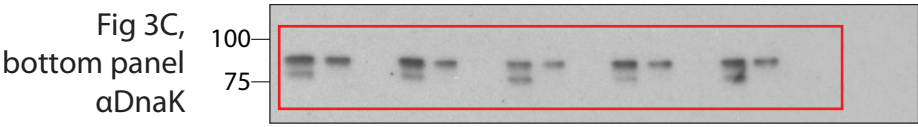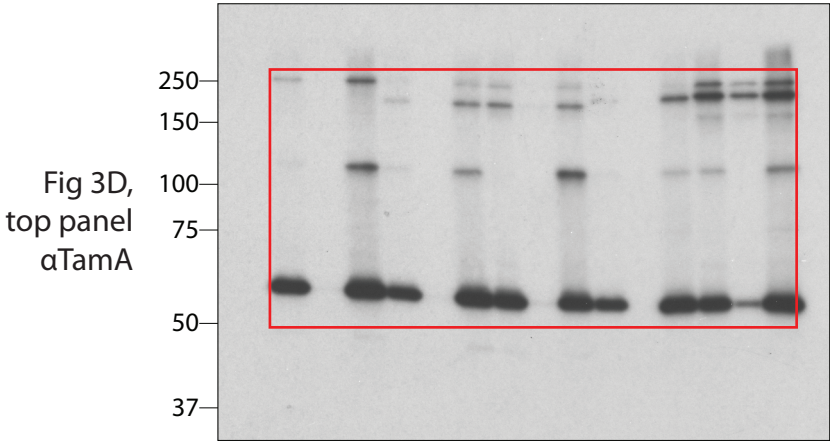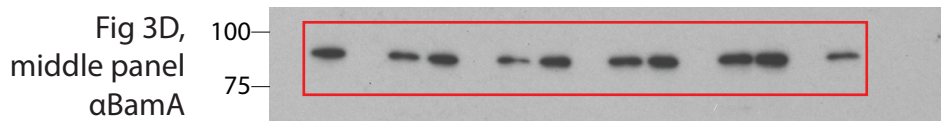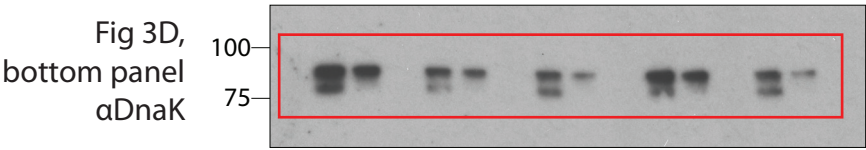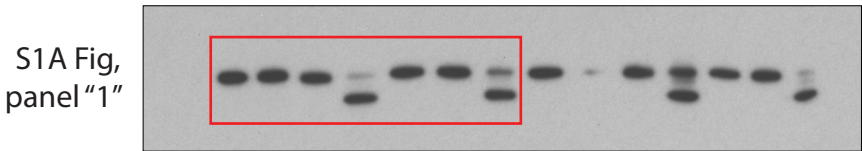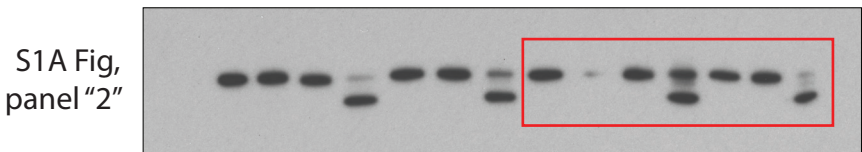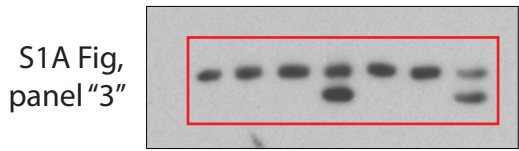

S2B Fig, top panel  
wildtype/pACYCDuet-1

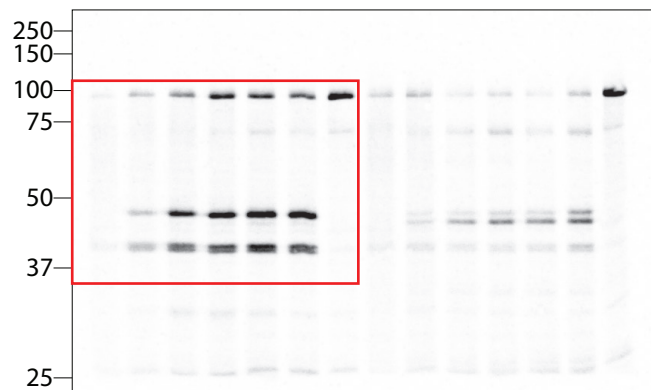

S2B Fig, middle panel  
 $\Delta tamA$ /pACYCDuet-1

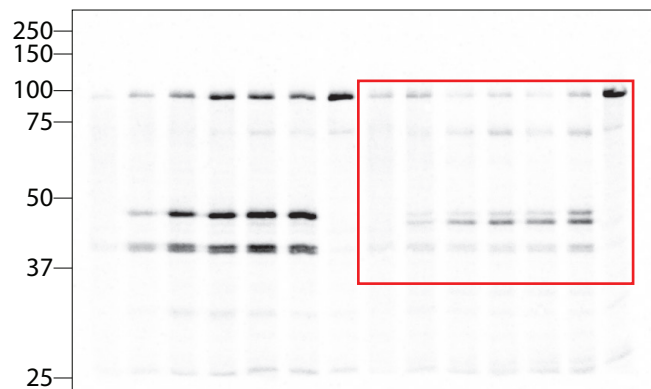

Same autoradiograph

S2B Fig, bottom panel  
 $\Delta tamA$ /pCJS69

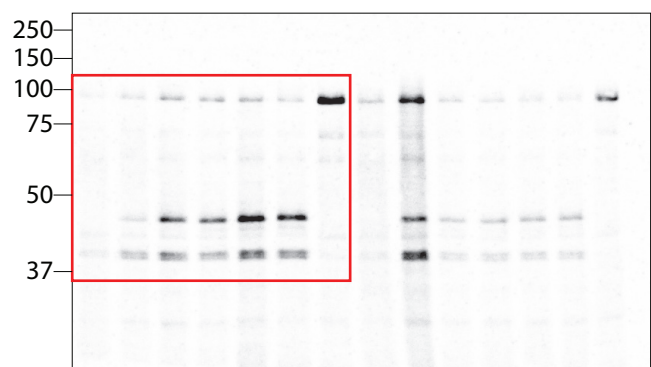

S2C Fig, top panel  
-PK

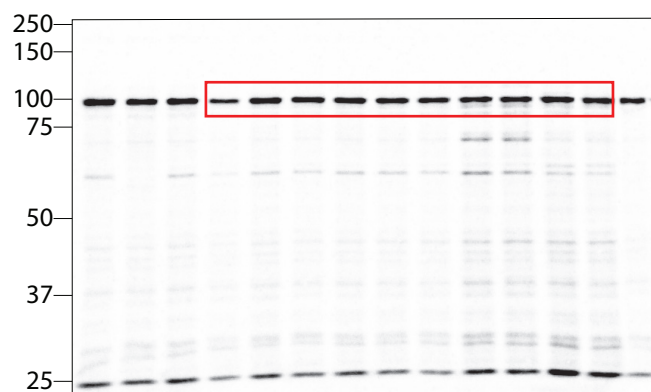

S2C Fig, bottom panel  
+PK

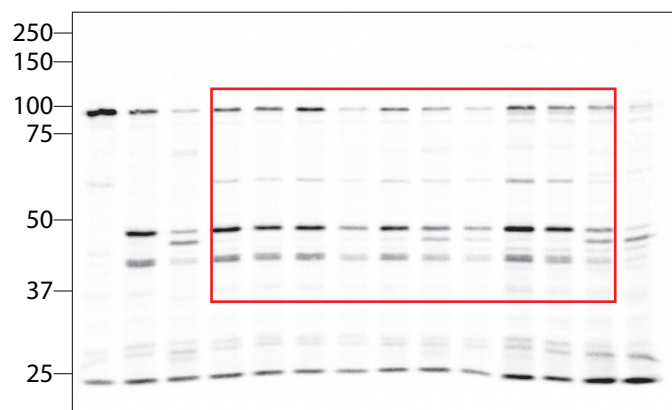

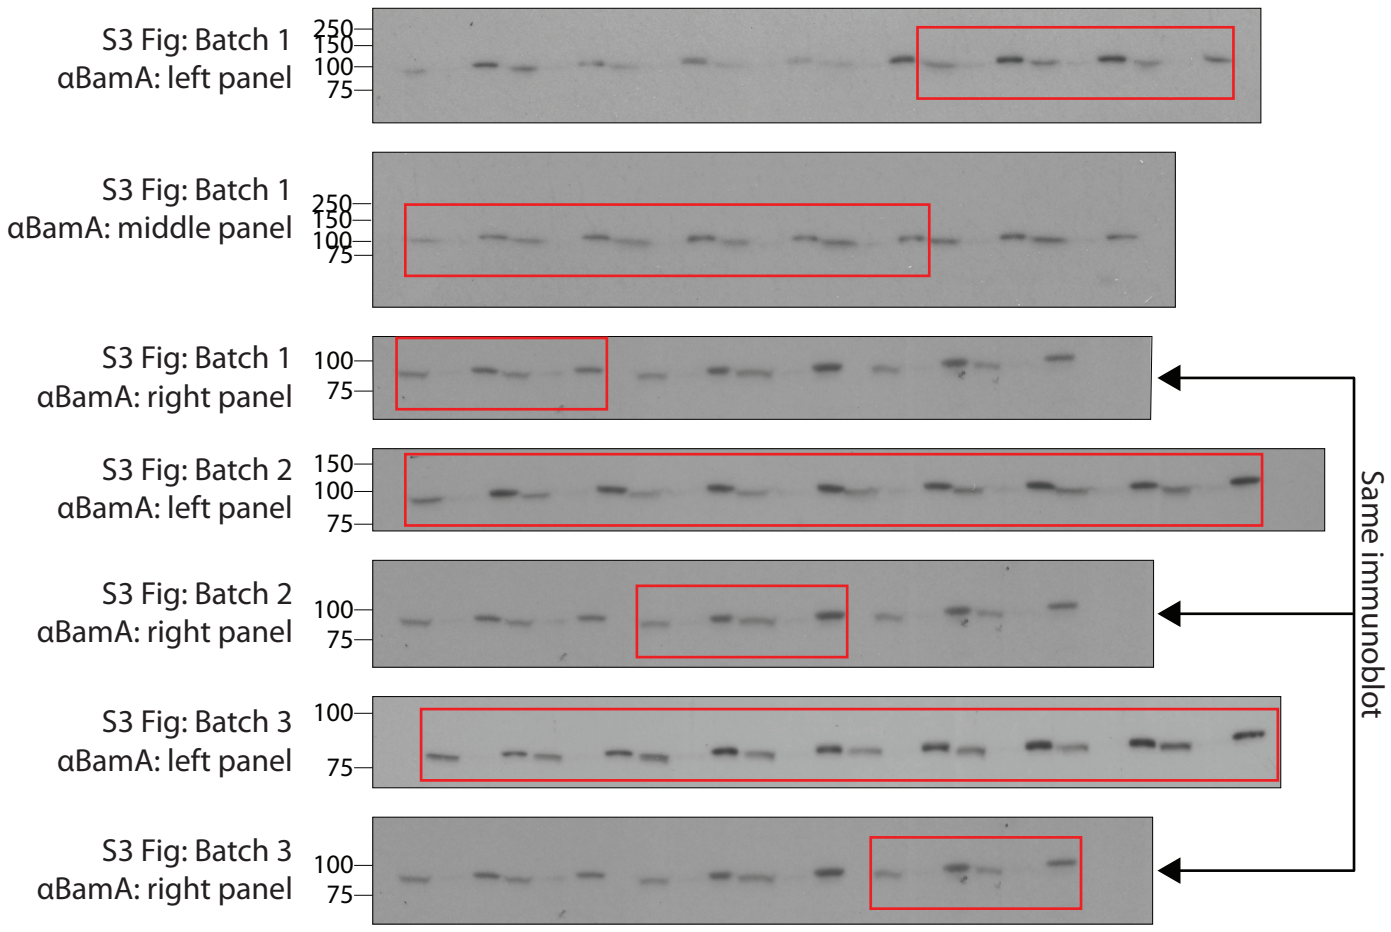



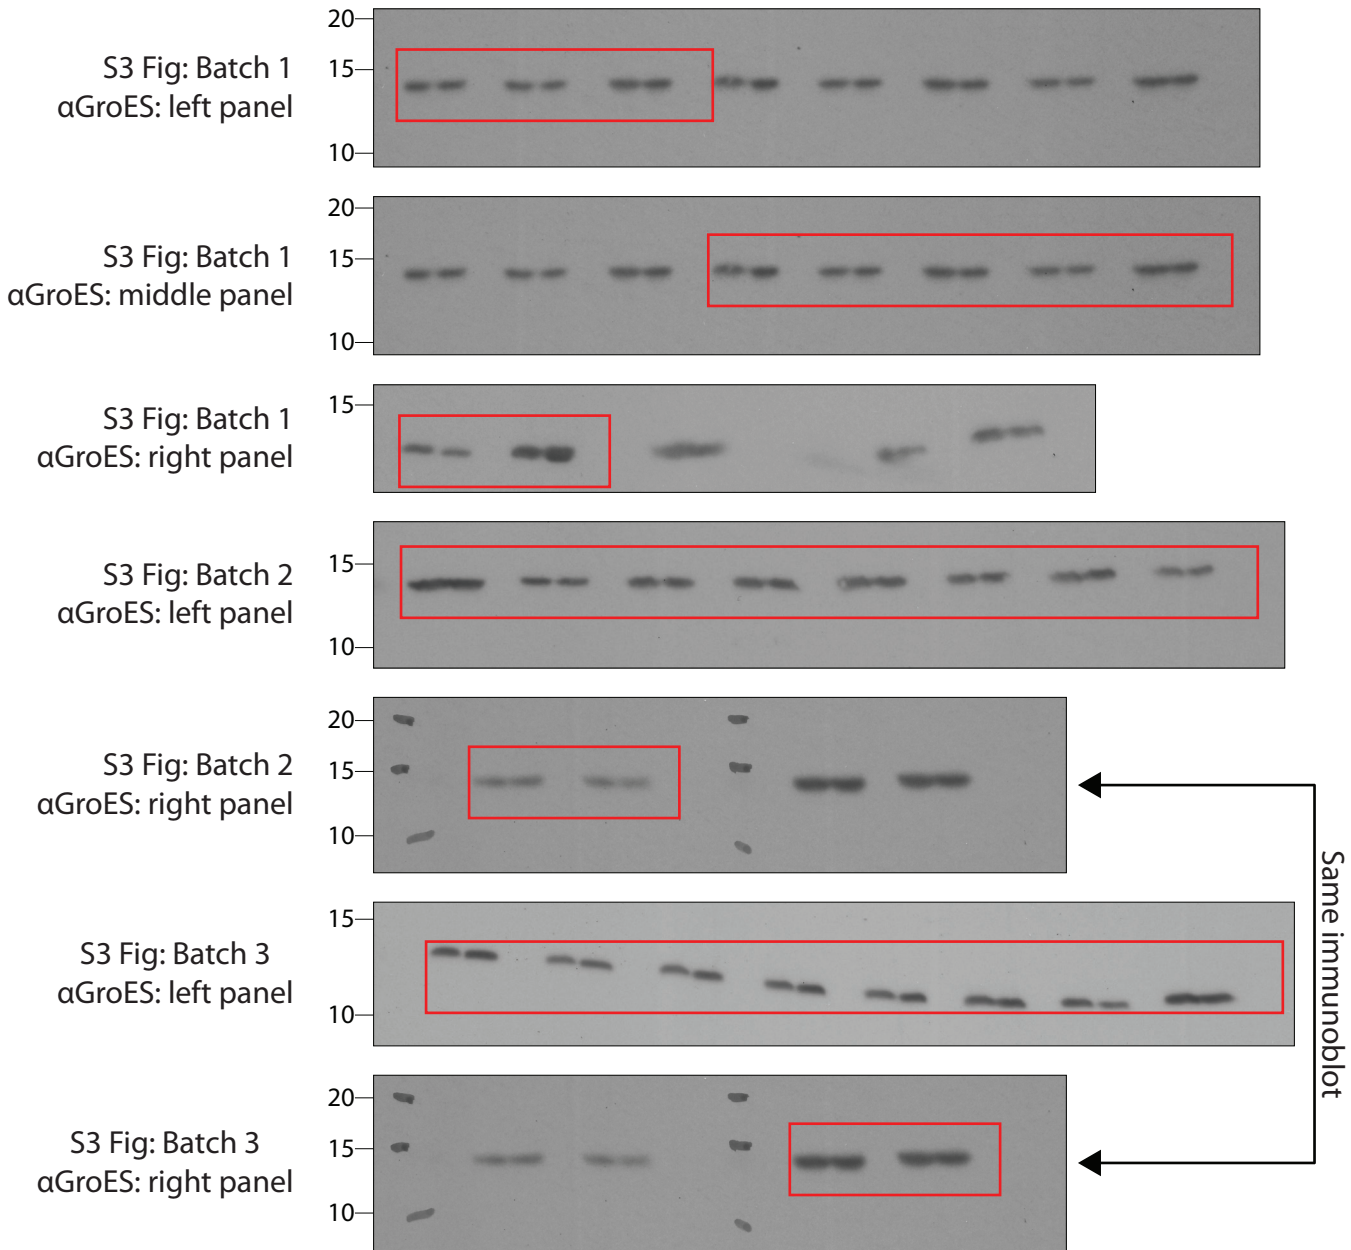

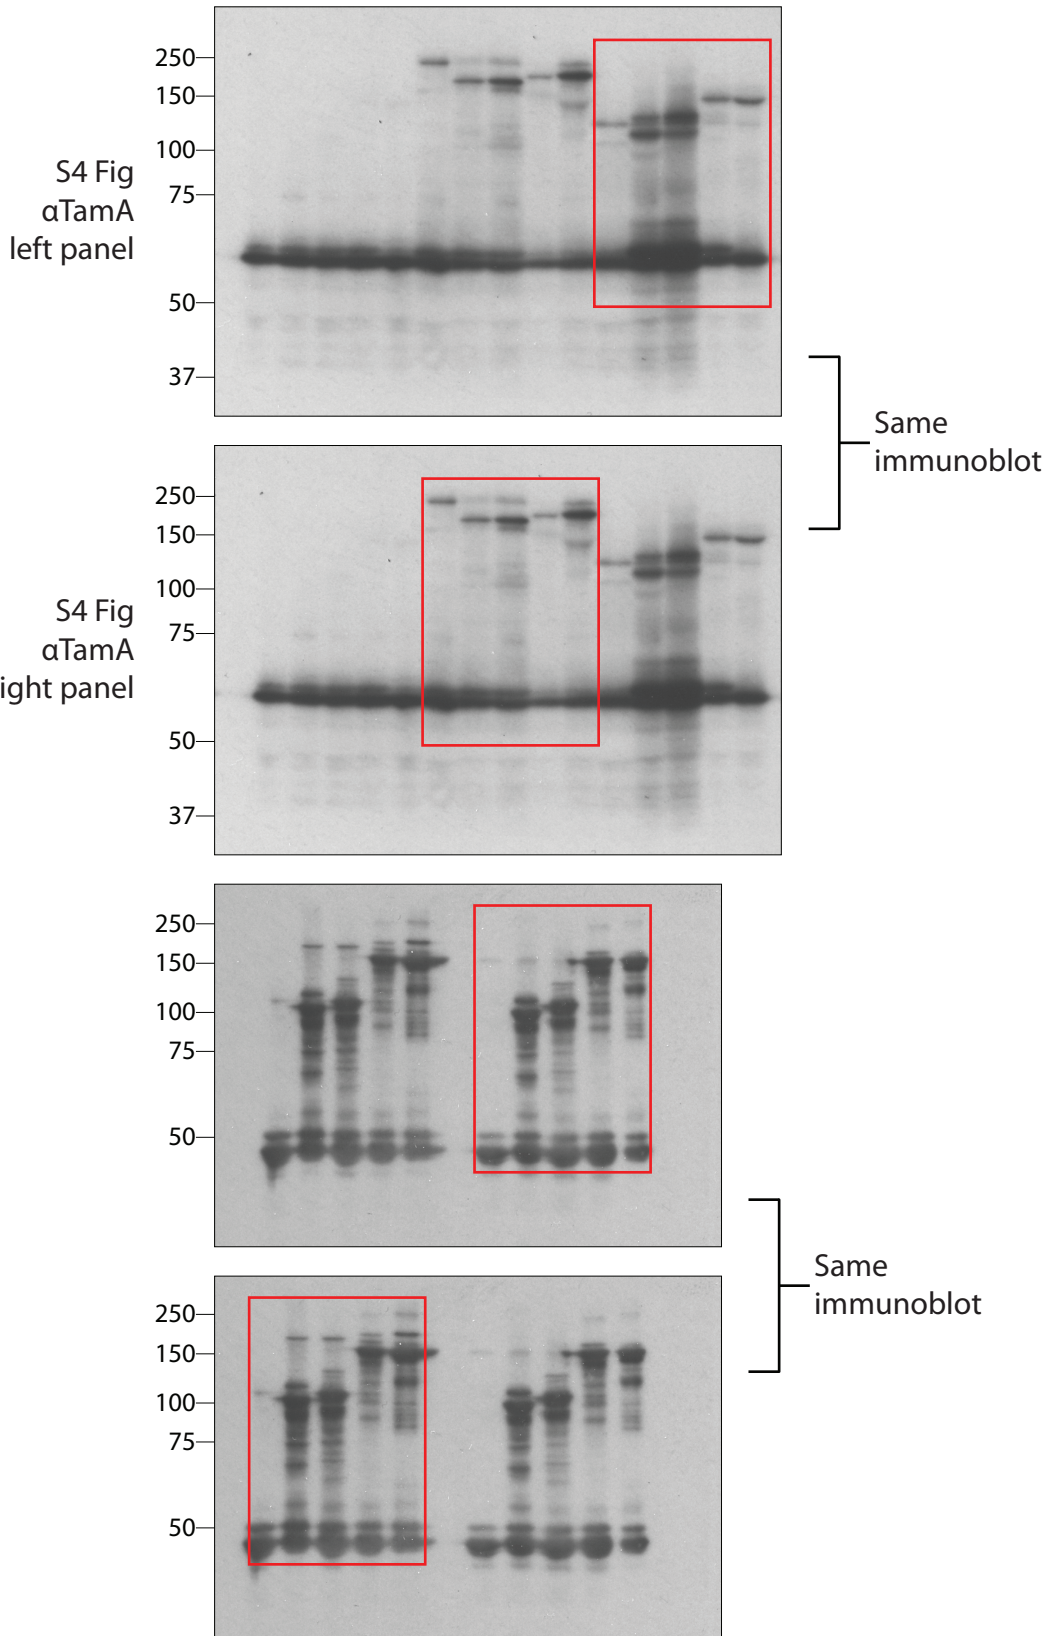



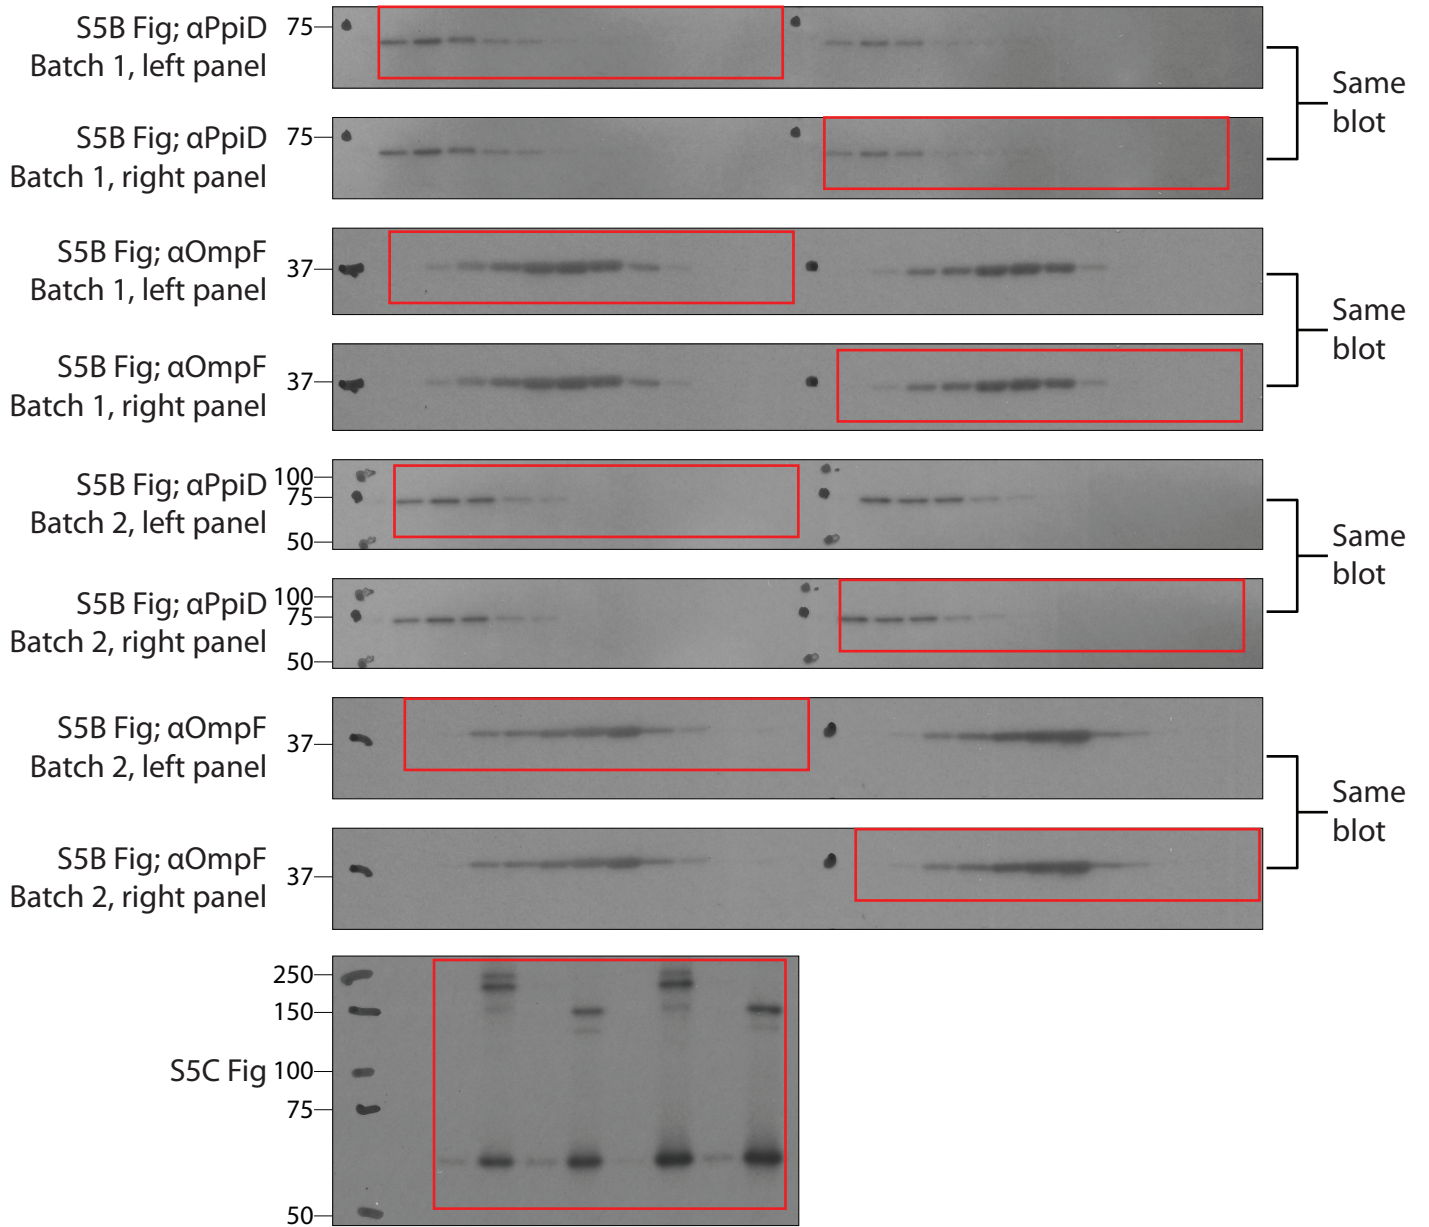

Supplement: pbio.3001523.s015.pdf [file pbio.3001523.s015.pdf]
