# Supplementary material for: A noncanonical chaperone interacts with drug efflux pumps during their assembly into bacterial outer membranes
Source: PubMed Central journal article supplement (PMC8809574; doi:10.1371/journal.pbio.3001523), 2022-01-21

TamA oxidised v reduced: Fig 2B, 2C, S1A Fig (2/2 immunoblots)

Immunoblot #1 - (raw image file for Fig. 2B, 2C, S1A Fig panel "1" and S1A Fig panel "2")

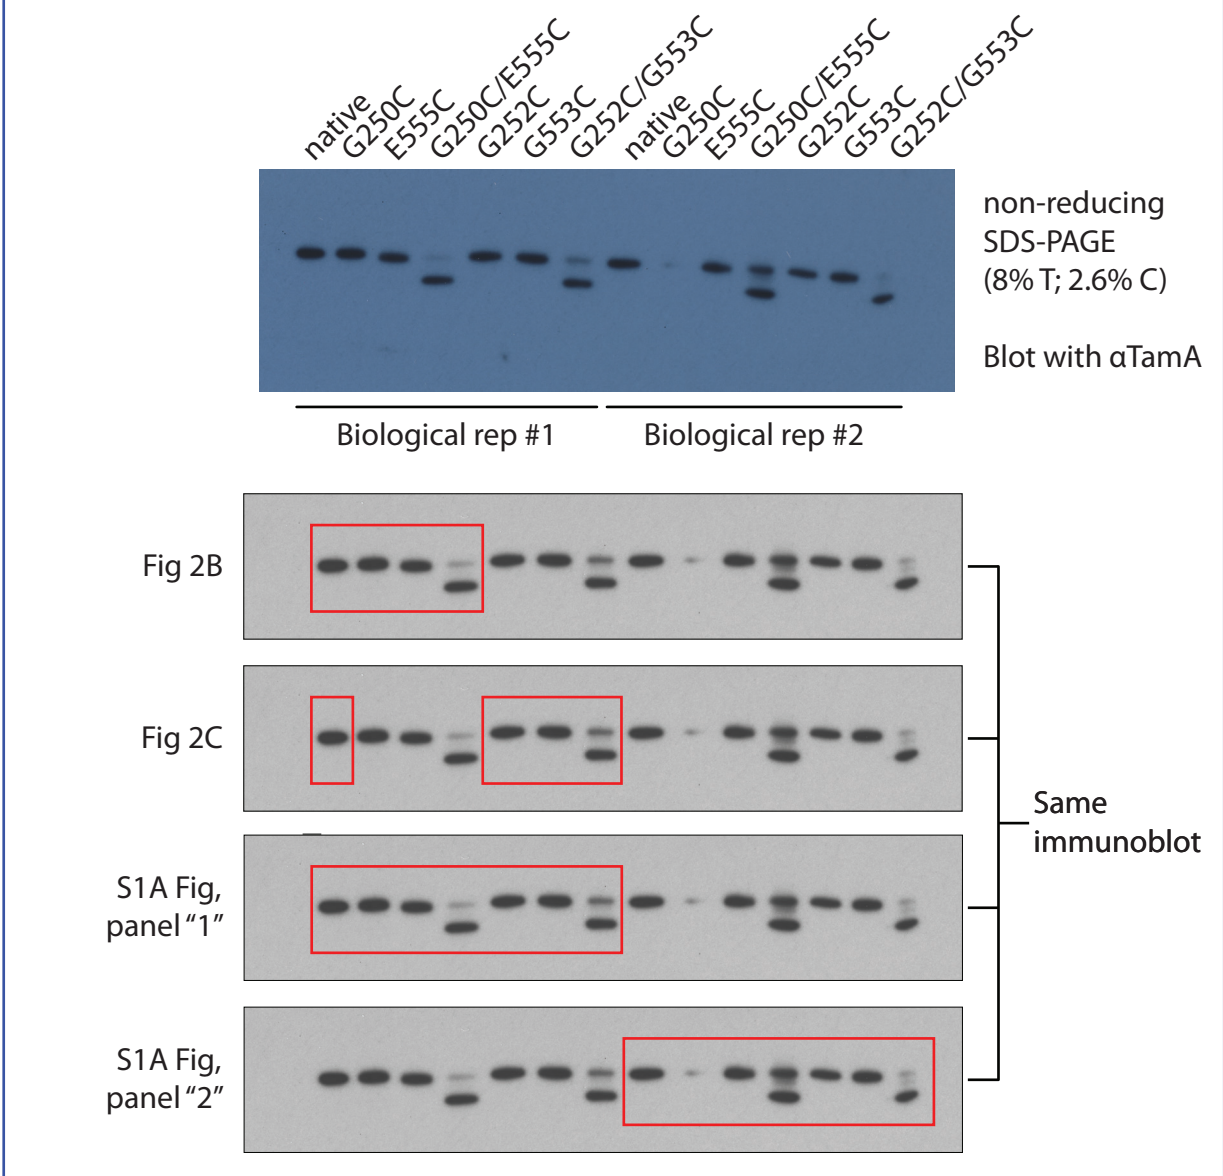

Immunoblot #2 - (raw image file for S1A Fig, panel "3")

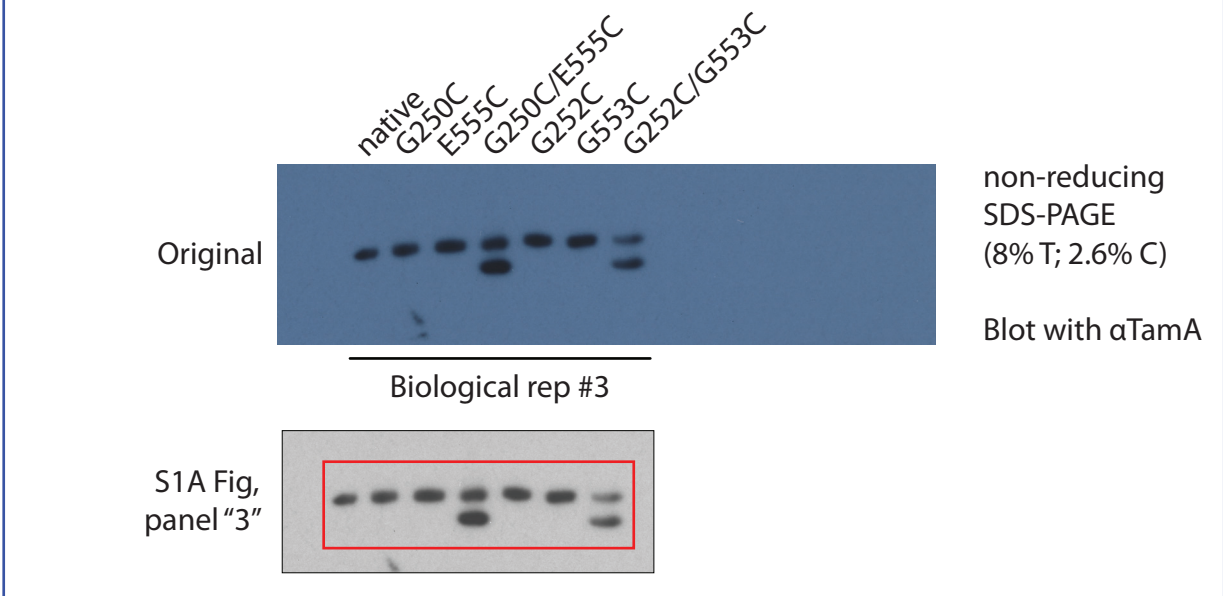

TamA-TolC crosslinks Fig 3C, 3D (3/18 immunoblots - total of 3/18 immunoblots)

Immunoblots #3-5 - (biological replicate 1 of Fig 3C, not included in figure itself)

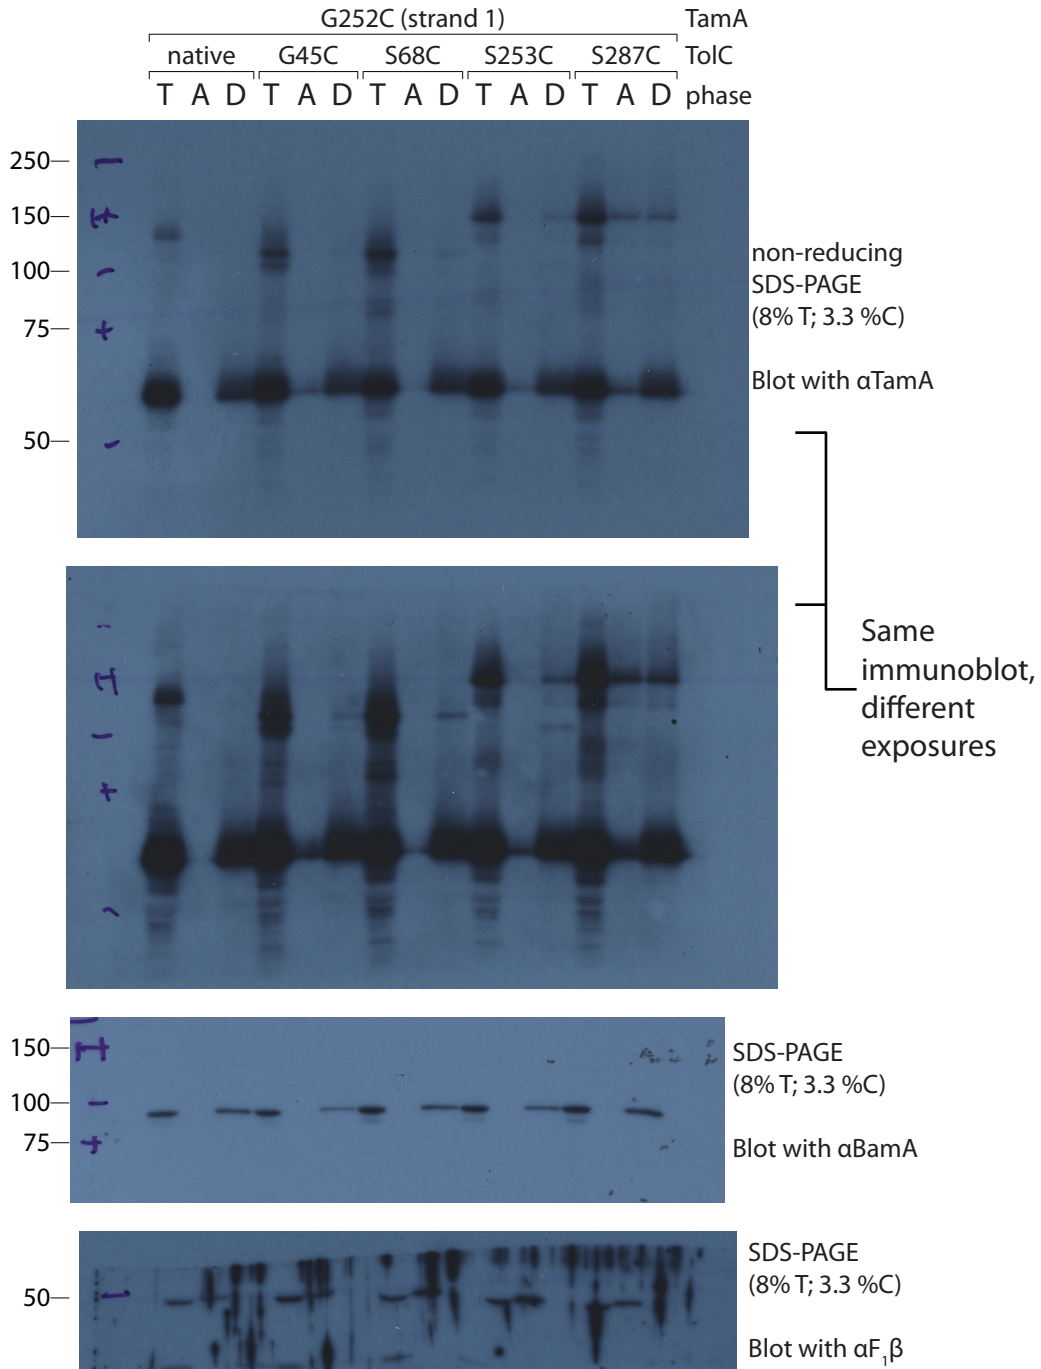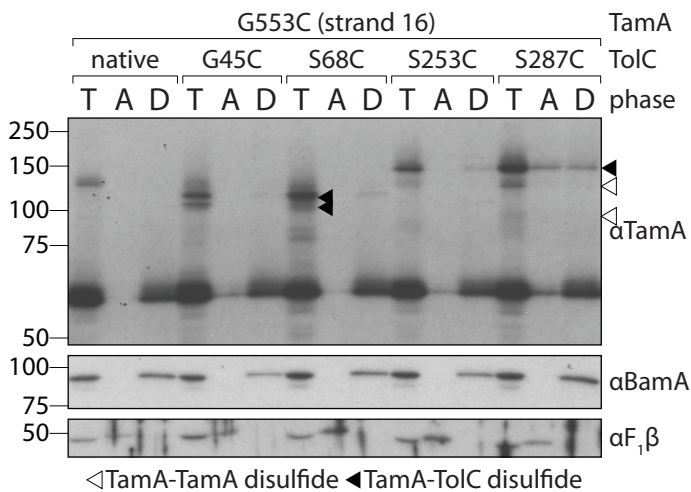

TamA-TolC crosslinks Fig 3C, 3D (3/18 immunoblots - total of 6/18 immunoblots)

Immunoblots #6-8 - (biological replicate 2 of Fig 3C)

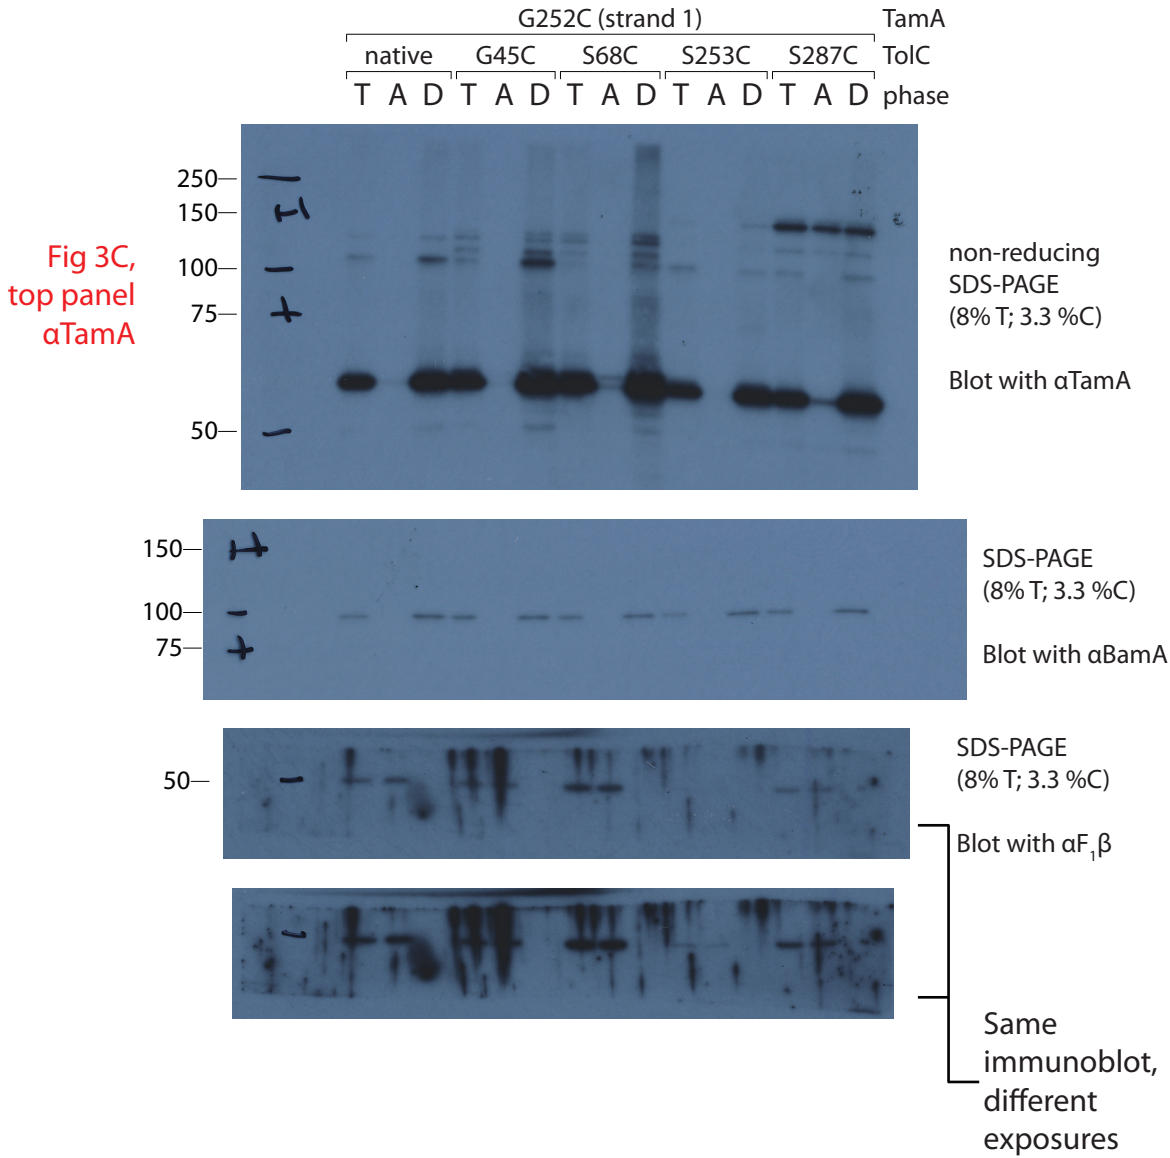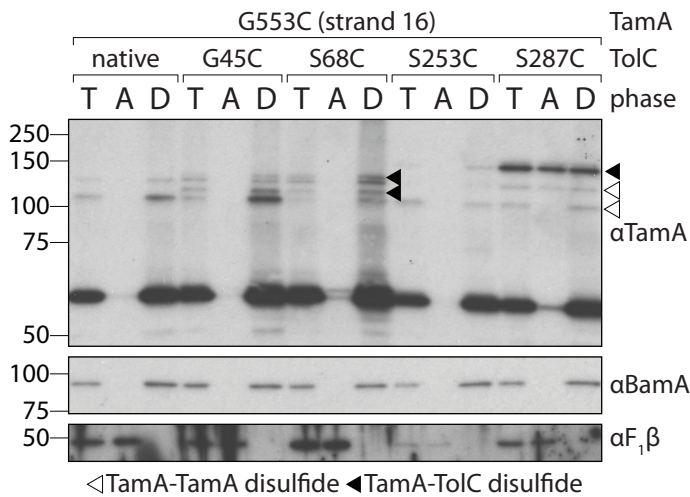

TamA-TolC crosslinks Fig 3C, 3D (3/18 immunoblots - total of 9/18 immunoblots)

Immunoblots #6-8 - (biological replicate 3 of Fig 3C)

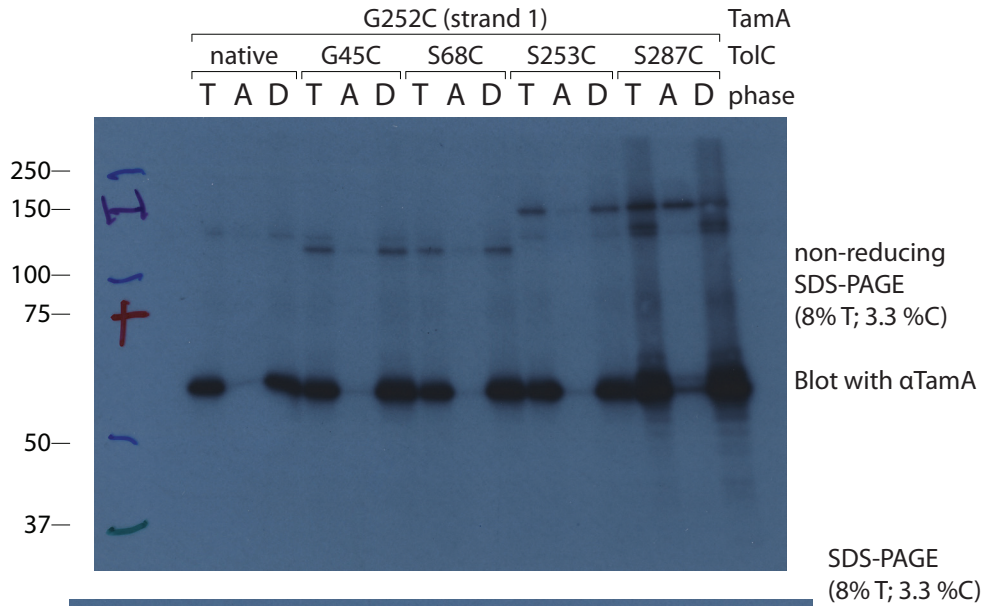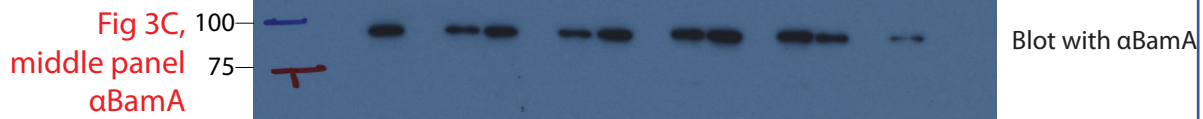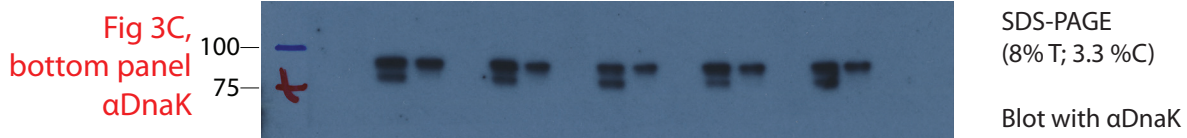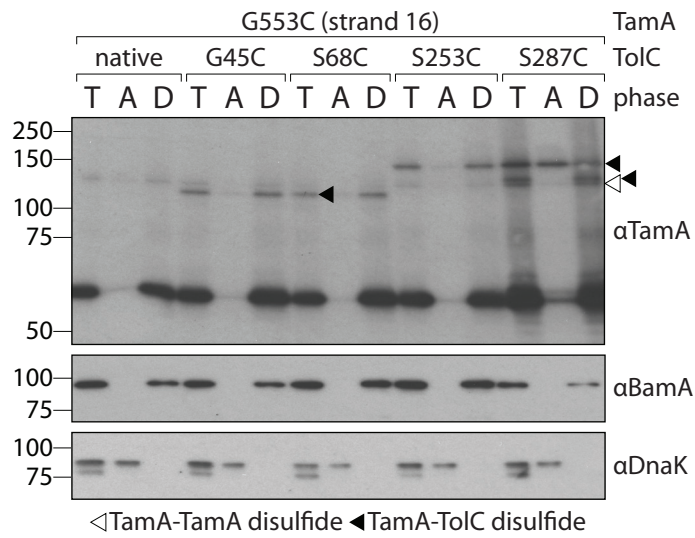

TamA-TolC crosslinks Fig 3C, 3D (3/18 immunoblots - total of 12/18 immunoblots)

Immunoblots #12-14 - (biological replicate 1 of Fig 3D, not included in figure itself)

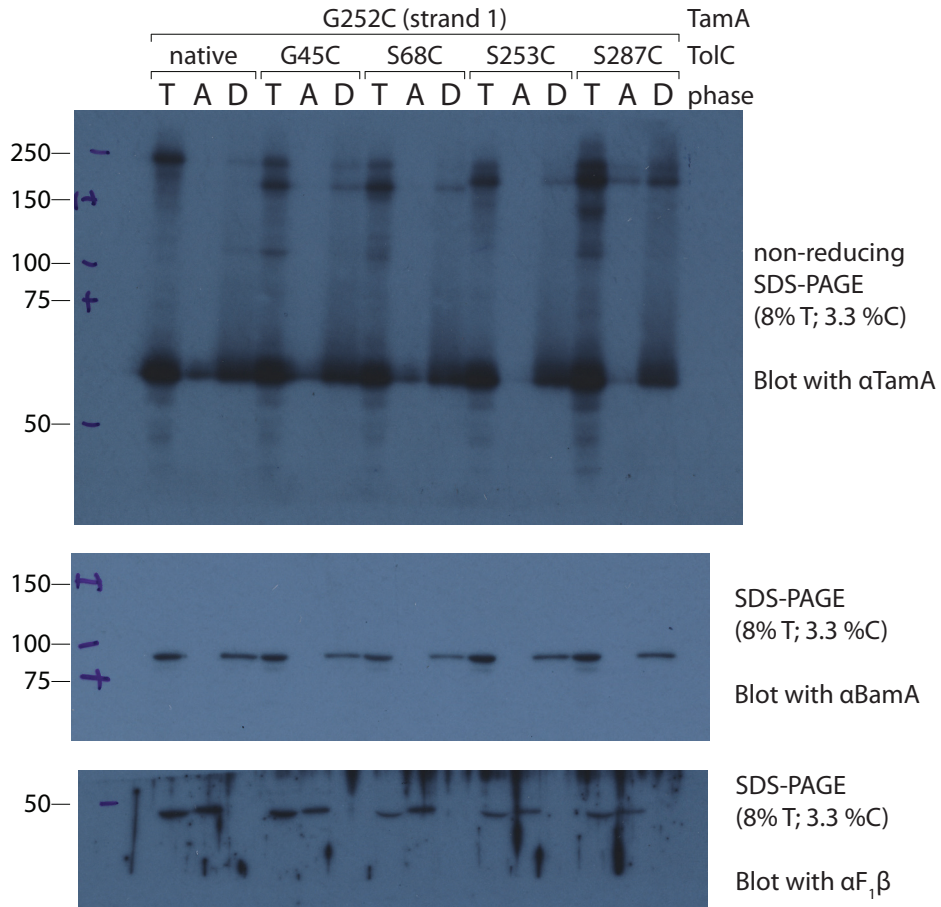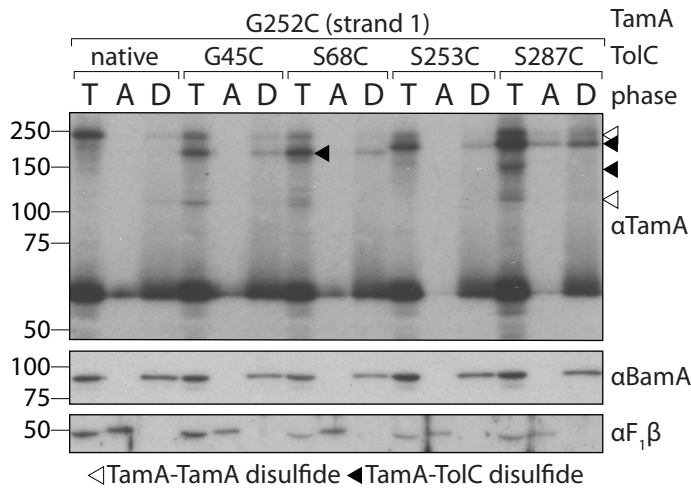

TamA-TolC crosslinks Fig 3C, 3D (3/18 immunoblots - total of 15/18 immunoblots)

Immunoblots #15-17 - (biological replicate 2 of Fig 3D)

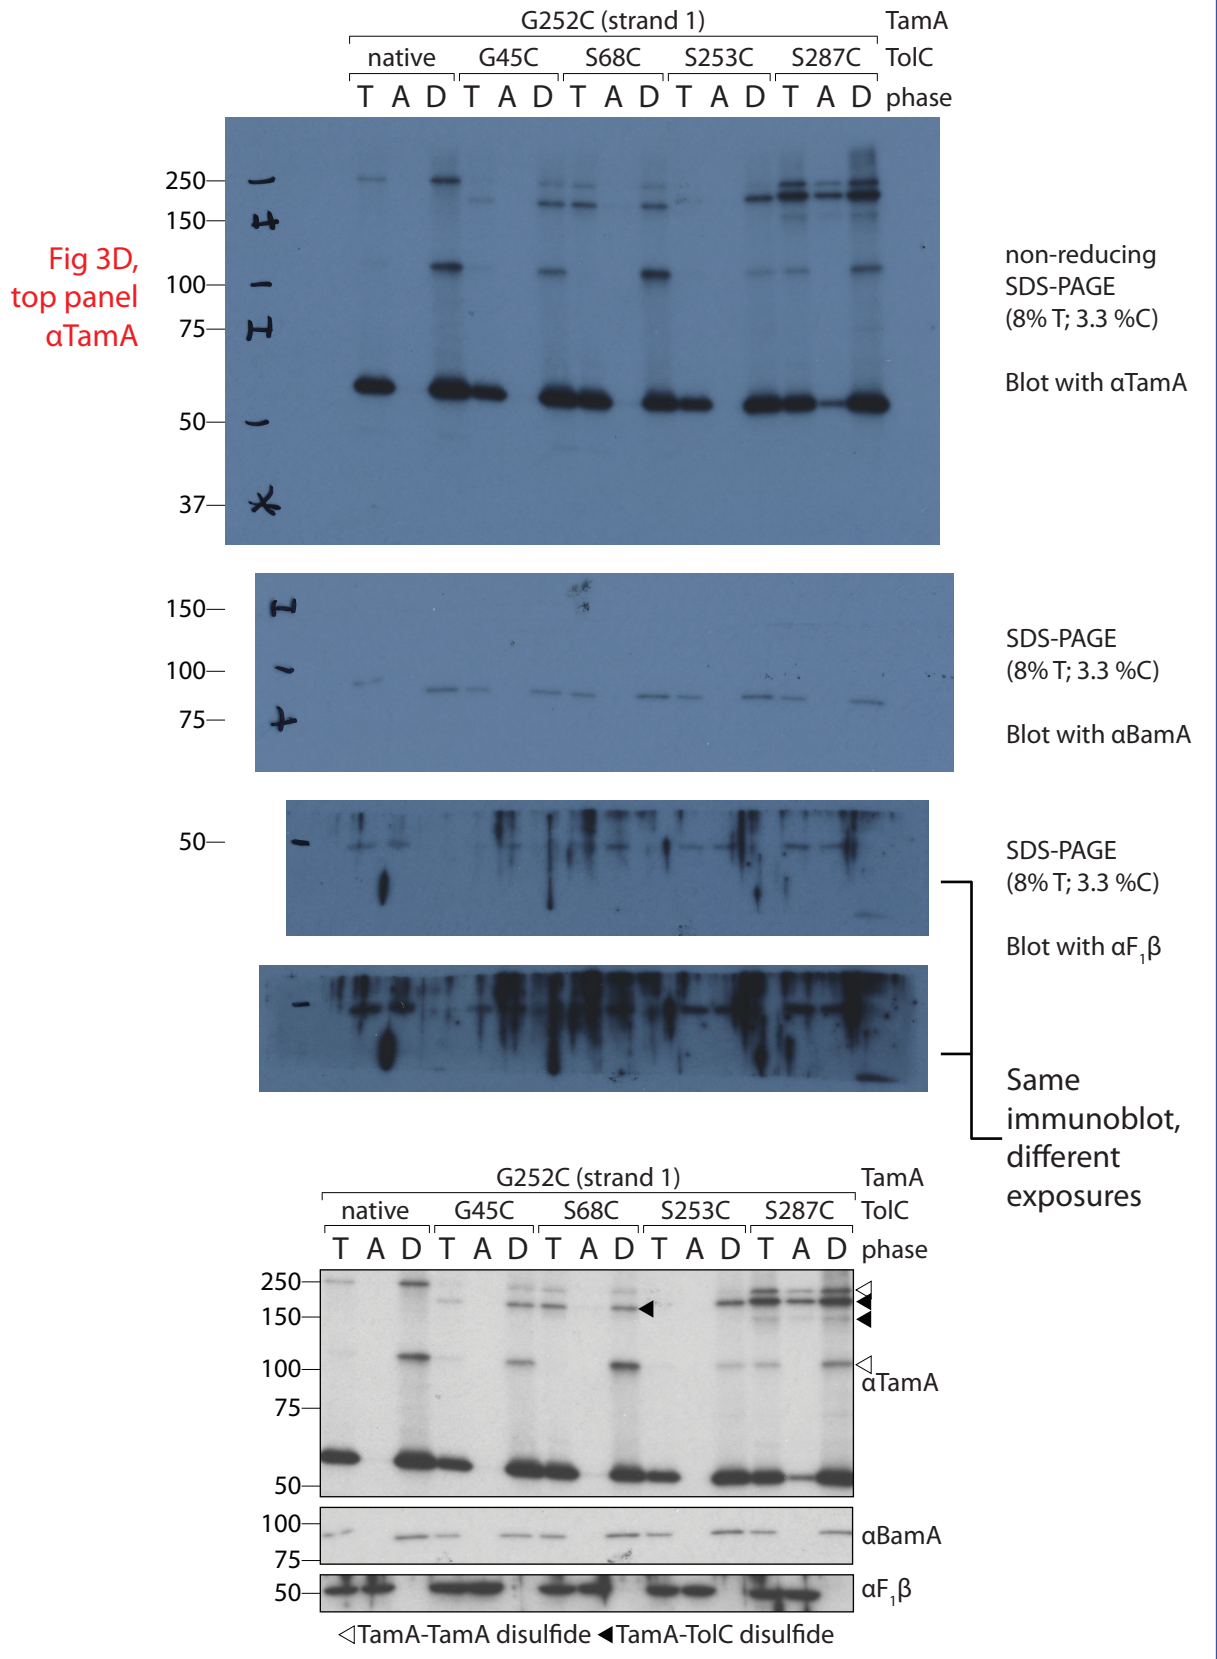

TamA-TolC crosslinks Fig 3C, 3D (3/18 immunoblots - total of 18/18 immunoblots)

Immunoblots #18-20 - (biological replicate 3 of Fig 3D)

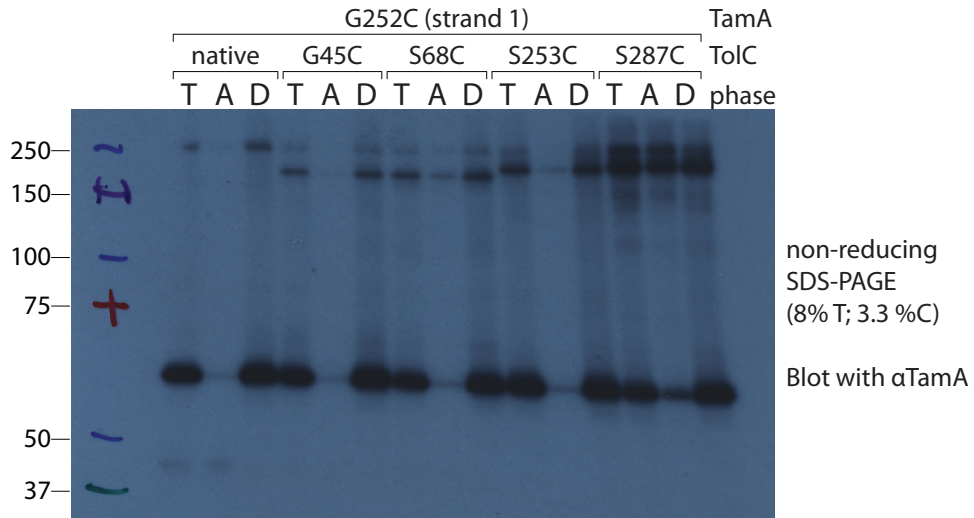

Fig 3D,  
middle panel  
 $\alpha$ BamA

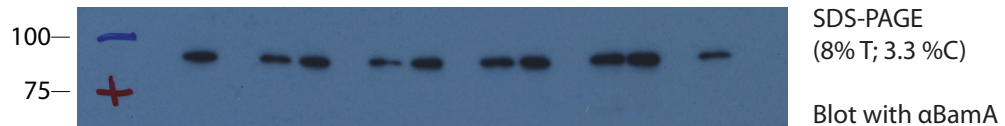

Fig 3D,  
bottom panel  
 $\alpha$ DnaK

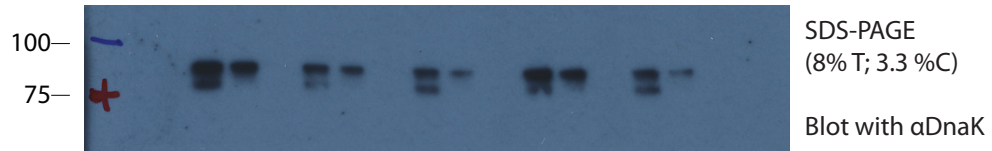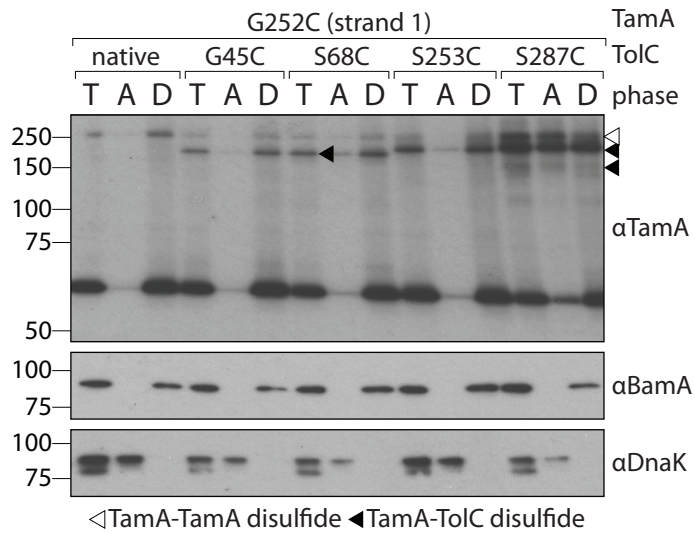

Immunoblot #21 - (S3 Fig; batch 1; αBamA; left panel)

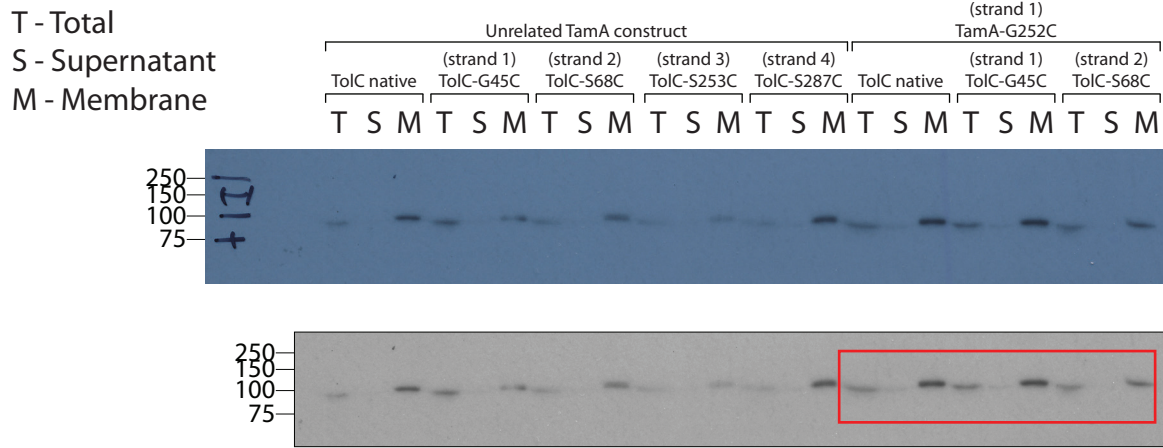

Immunoblot #22 - (S3 Fig; batch 1; αBamA; middle panel)

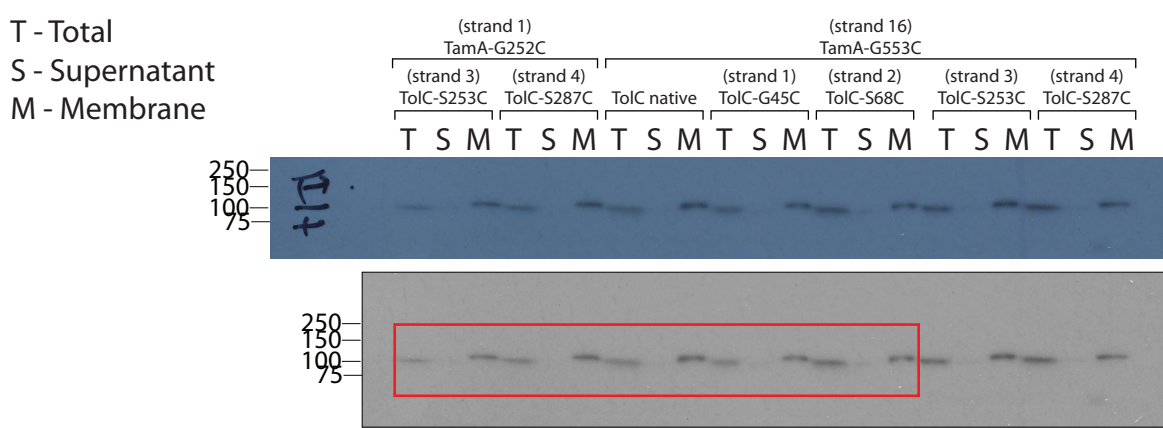

Immunoblot #23 - (S3 Fig; batches 1-3; αBamA; right panel)

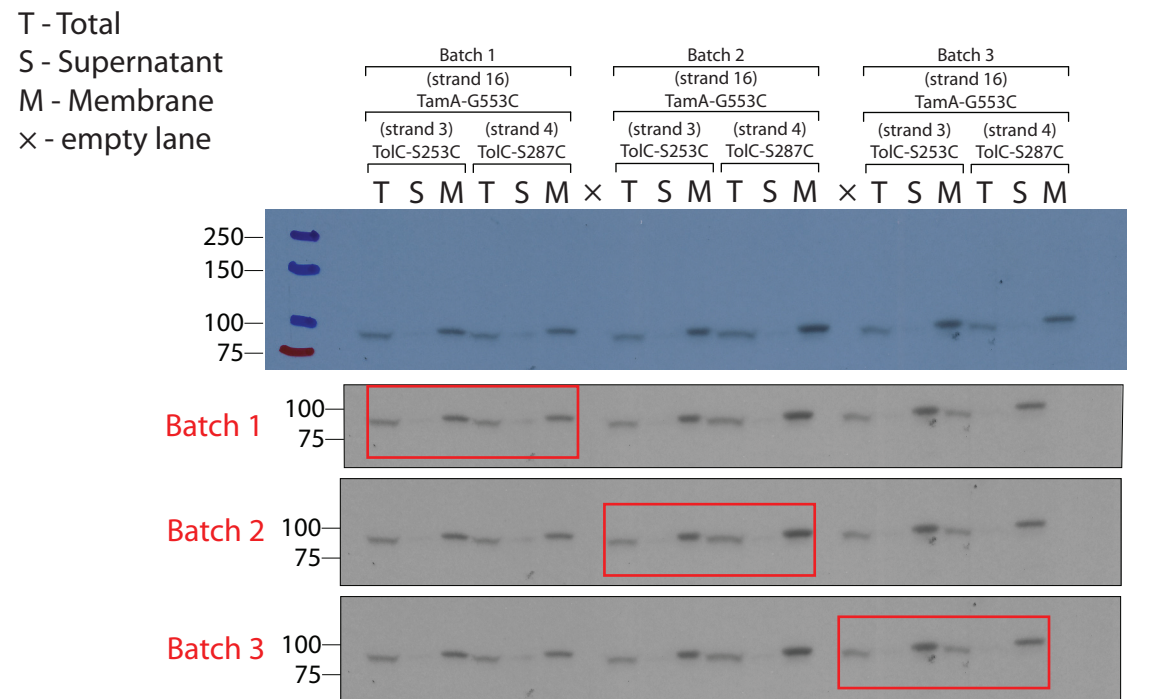



Immunoblot #24 - (S3 Fig; batch 2; αBamA; left panel)

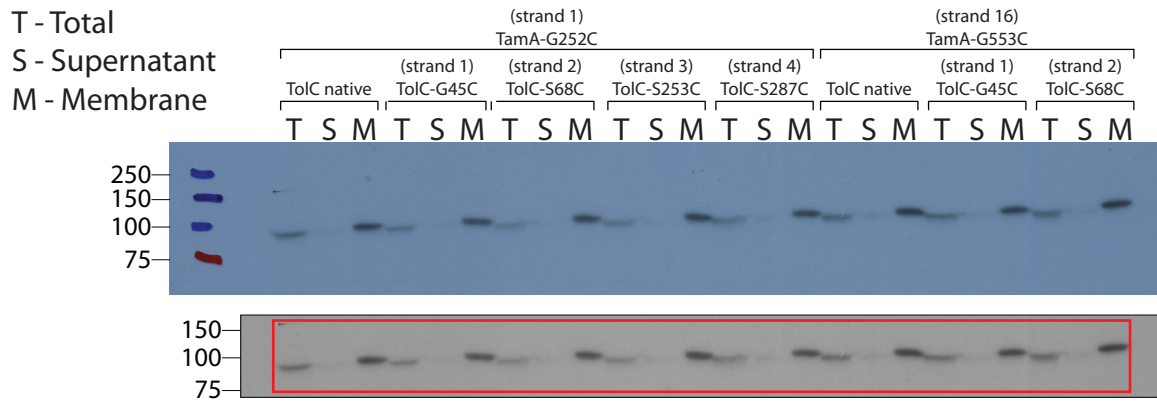

Immunoblot #25 - (S3 Fig; batch 3; αBamA; left panel)

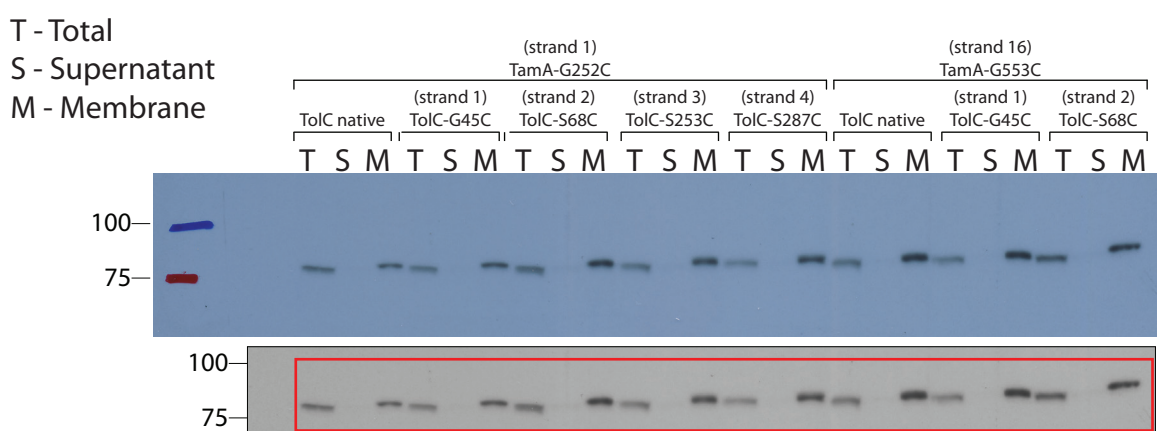

Immunoblot #26 - (S3 Fig; batch 1; αSurA; left panel)

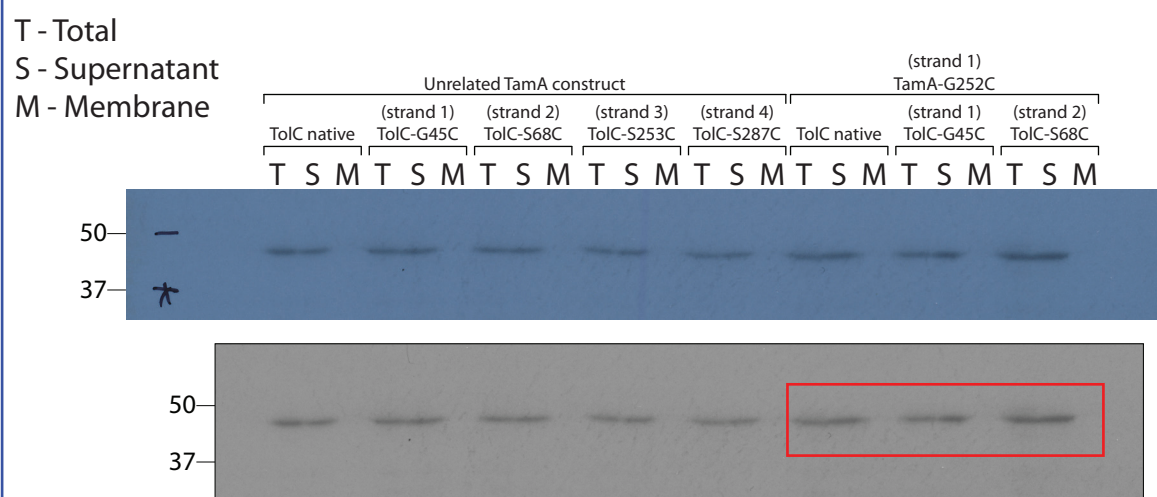

Immunoblot #27 - (S3 Fig; batch 1; αSurA; left panel)

T - Total  
 S - Supernatant  
 M - Membrane

|                          |   |                          |   |             |   |                           |   |                         |   |                          |   |                          |   |   |   |   |   |   |   |
|--------------------------|---|--------------------------|---|-------------|---|---------------------------|---|-------------------------|---|--------------------------|---|--------------------------|---|---|---|---|---|---|---|
| (strand 1)<br>TamA-G252C |   |                          |   |             |   | (strand 16)<br>TamA-G553C |   |                         |   |                          |   |                          |   |   |   |   |   |   |   |
| (strand 3)<br>TolC-S253C |   | (strand 4)<br>TolC-S287C |   | TolC native |   | (strand 1)<br>TolC-G45C   |   | (strand 2)<br>TolC-S68C |   | (strand 3)<br>TolC-S253C |   | (strand 4)<br>TolC-S287C |   |   |   |   |   |   |   |
| T                        | S | M                        | T | S           | M | T                         | S | M                       | T | S                        | M | T                        | T | T | S | M | T | S | M |

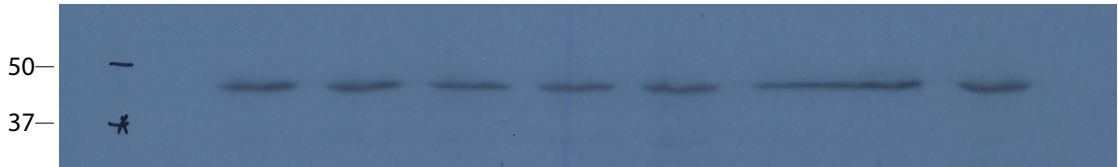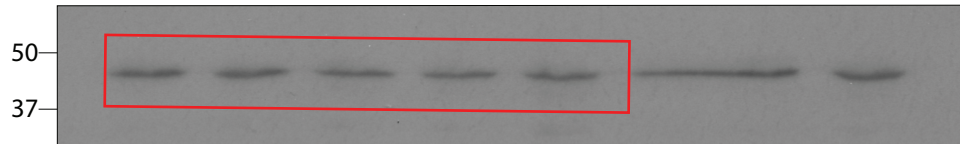

NB: Quadruplicate T - there were potential issues with the lanes/wells hence multiple loading

Immunoblot #28 - (S3 Fig; batches 1-3; αSurA; right panel)

T - Total  
 S - Supernatant  
 M - Membrane  
 × - empty lane

|                                      |   |                          |   |   |   |                                      |   |                          |   |   |   |                                      |   |                          |   |   |   |   |   |
|--------------------------------------|---|--------------------------|---|---|---|--------------------------------------|---|--------------------------|---|---|---|--------------------------------------|---|--------------------------|---|---|---|---|---|
| Batch 1<br>(strand 16)<br>TamA-G553C |   |                          |   |   |   | Batch 2<br>(strand 16)<br>TamA-G553C |   |                          |   |   |   | Batch 3<br>(strand 16)<br>TamA-G553C |   |                          |   |   |   |   |   |
| (strand 3)<br>TolC-S253C             |   | (strand 4)<br>TolC-S287C |   |   |   | (strand 3)<br>TolC-S253C             |   | (strand 4)<br>TolC-S287C |   |   |   | (strand 3)<br>TolC-S253C             |   | (strand 4)<br>TolC-S287C |   |   |   |   |   |
| T                                    | S | M                        | T | S | M | ×                                    | T | S                        | M | T | S | M                                    | × | T                        | S | M | T | S | M |

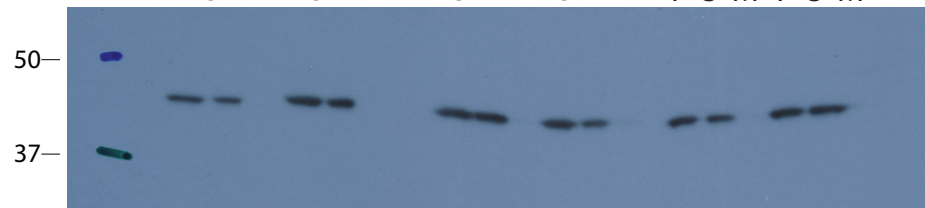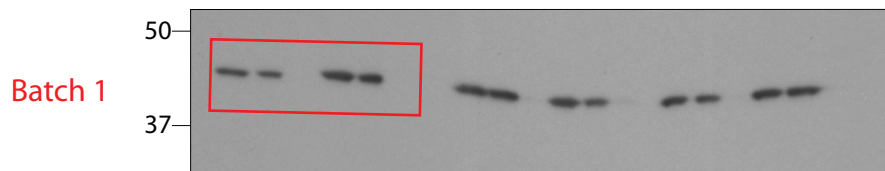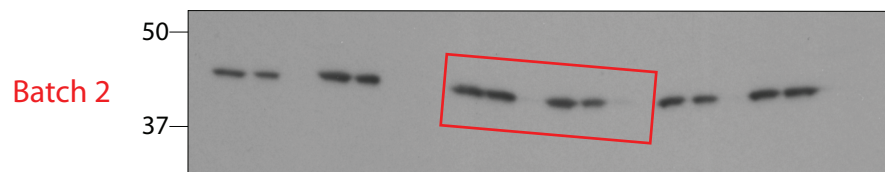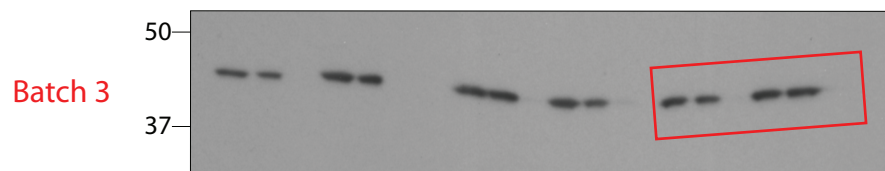

NB: Ran lanes close to the end of the gel where it started to bend

Immunoblot #29 - (S3 Fig; batch 2; αSurA; left panel)

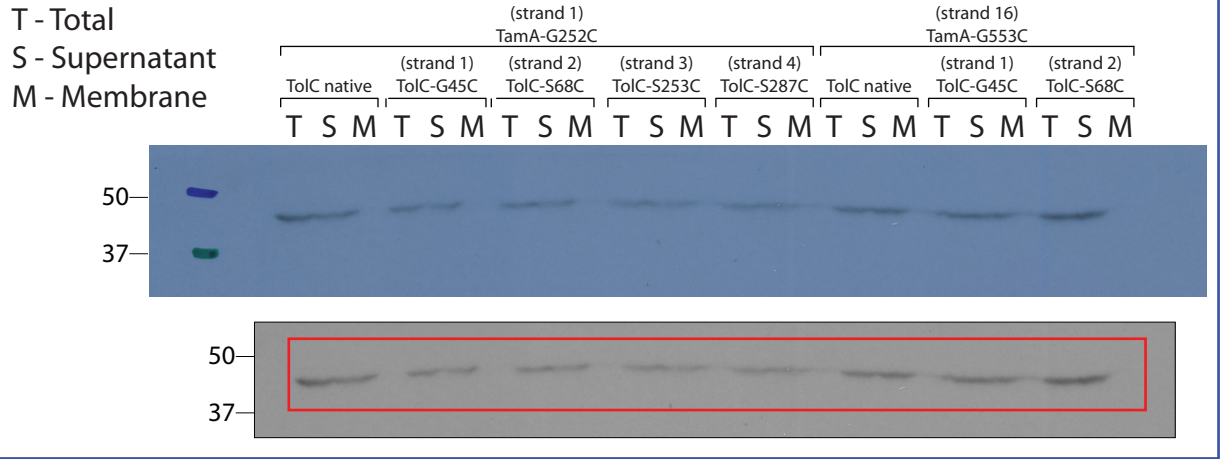

Immunoblot #30 - (S3 Fig; batch 3; αSurA; left panel)

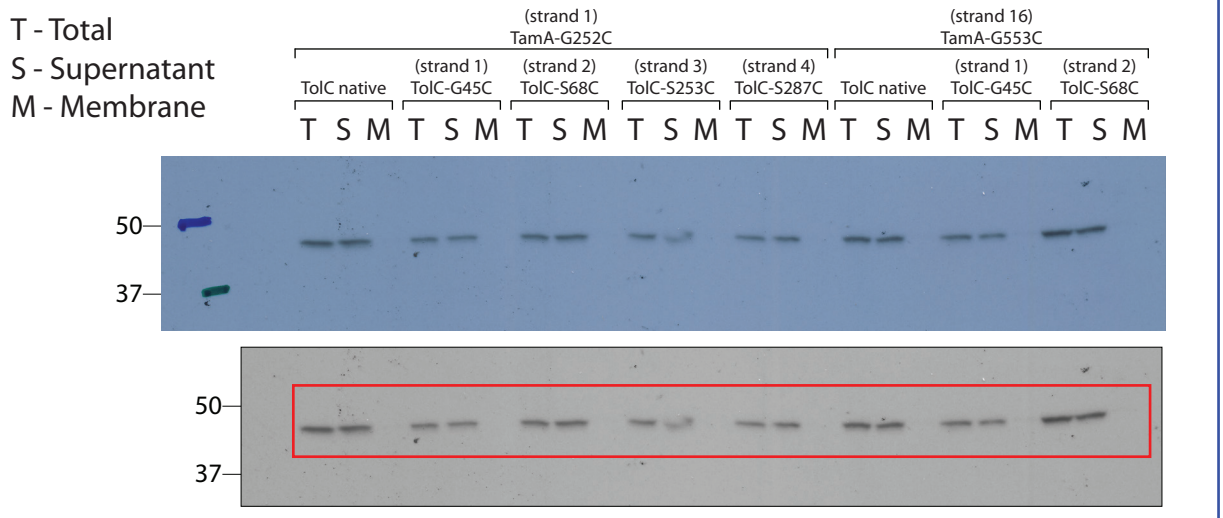

Immunoblot #31 - (S3 Fig; batch 1; αGroES; left and middle panels)

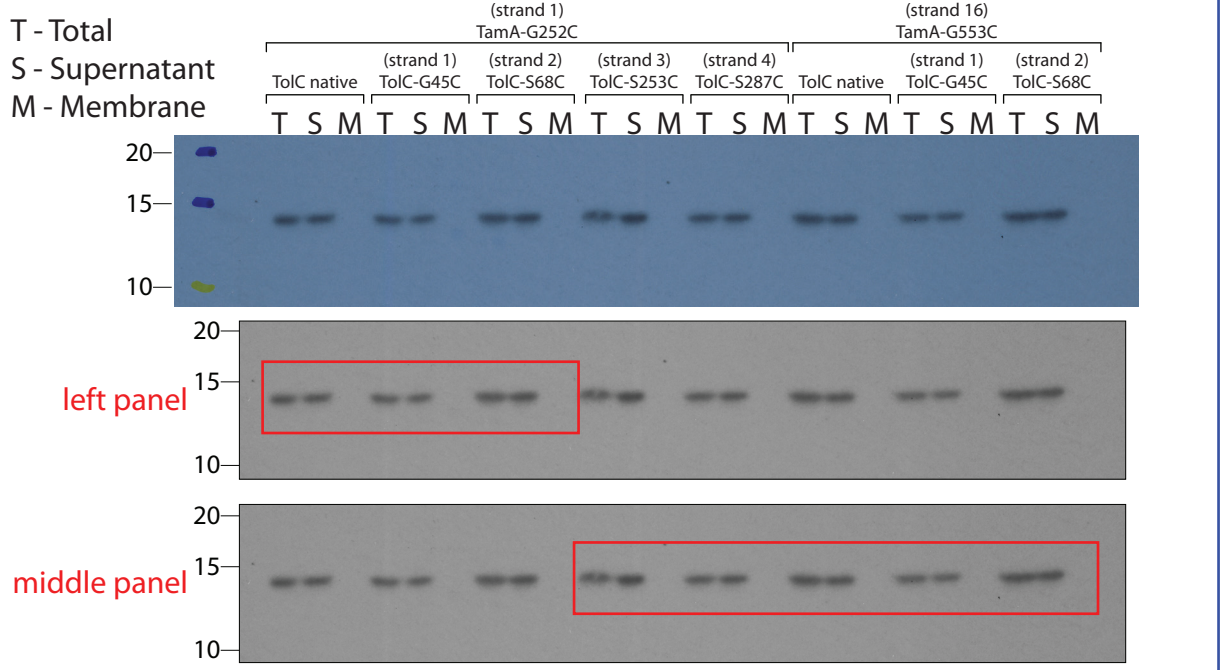

Immunoblot #32 - (S3 Fig; batch 1; αGroES; right panel)

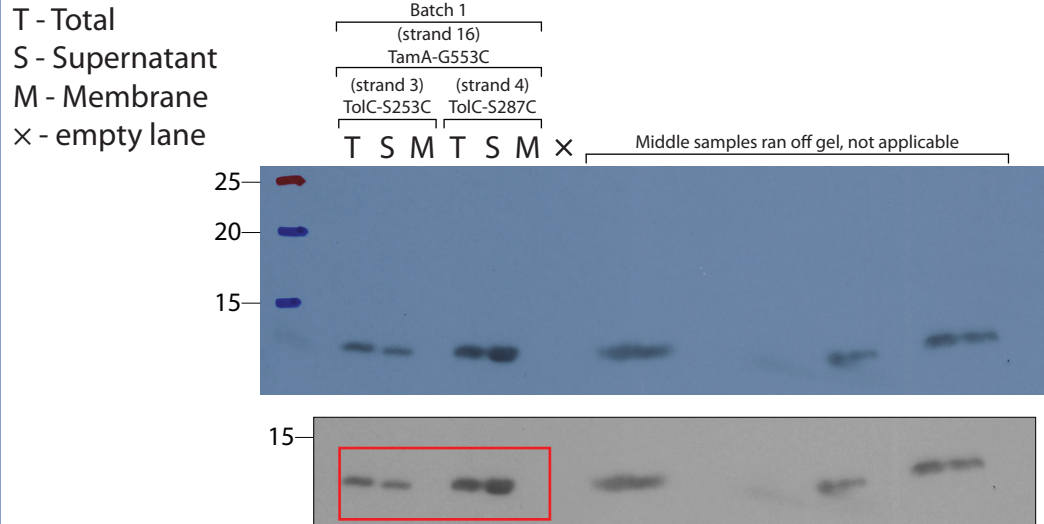

Immunoblot #33 - (S3 Fig; batch 2; αGroES; left panel)

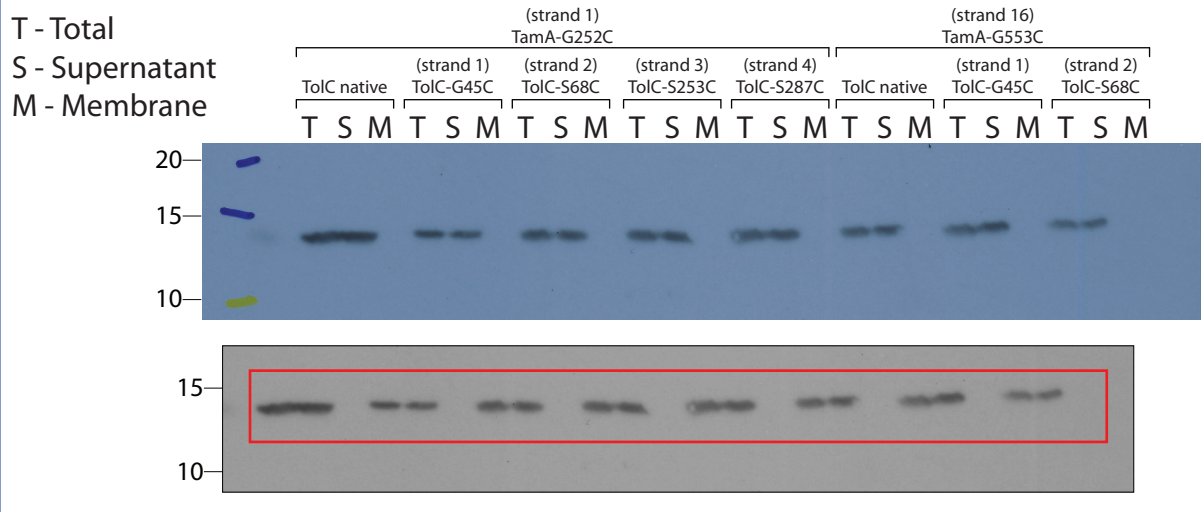

Immunoblot #34 - (S3 Fig; batch 3; αGroES; left panel)

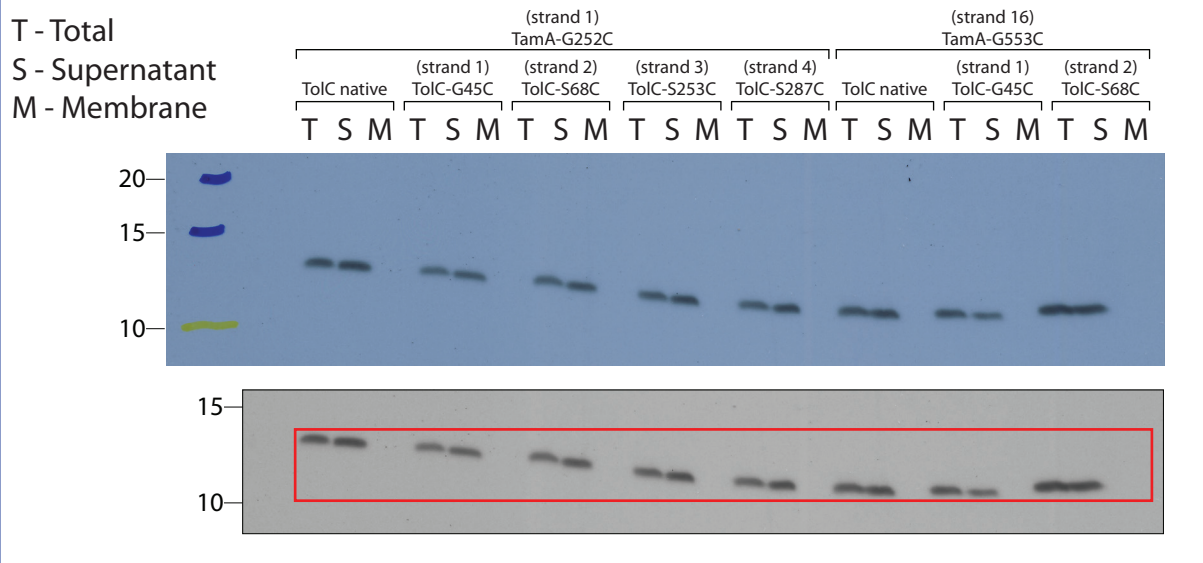

Immunoblot #35 - (S3 Fig; batches 2-3; αGroES; right panels)

T - Total  
S - Supernatant  
M - Membrane

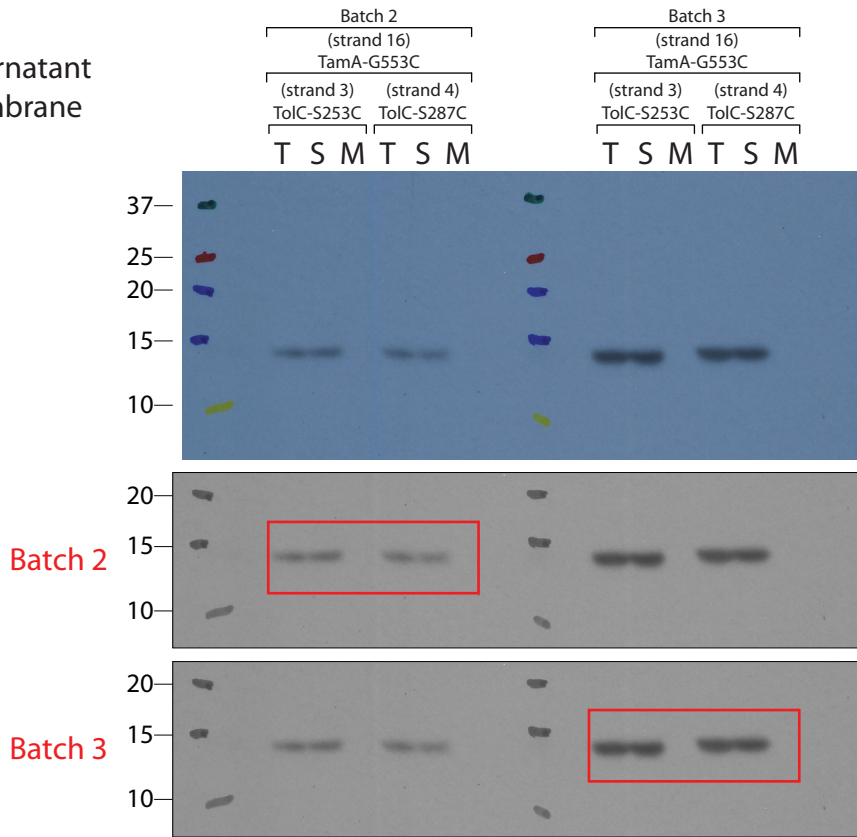

Immunoblot #36 - (S4 Fig; αTamA; left and right panels)

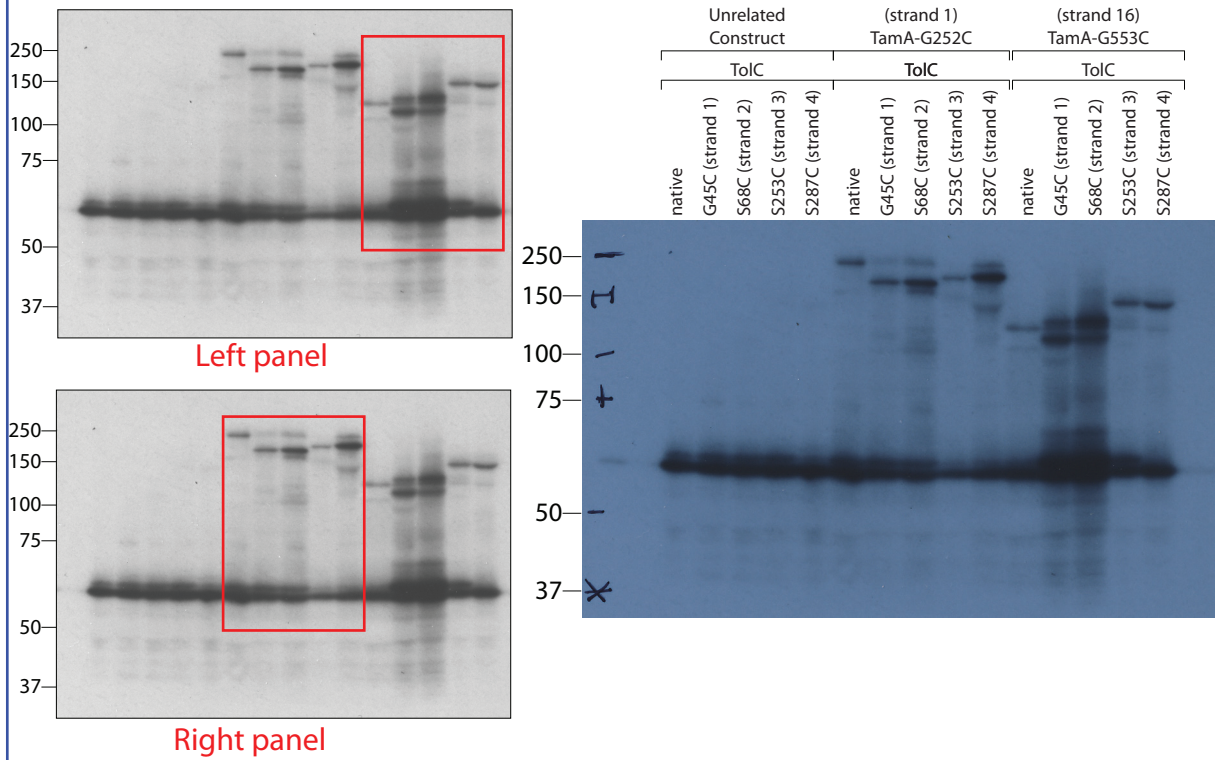

Immunoblot #37 - (S4 Fig; αTolC; left and right panels)

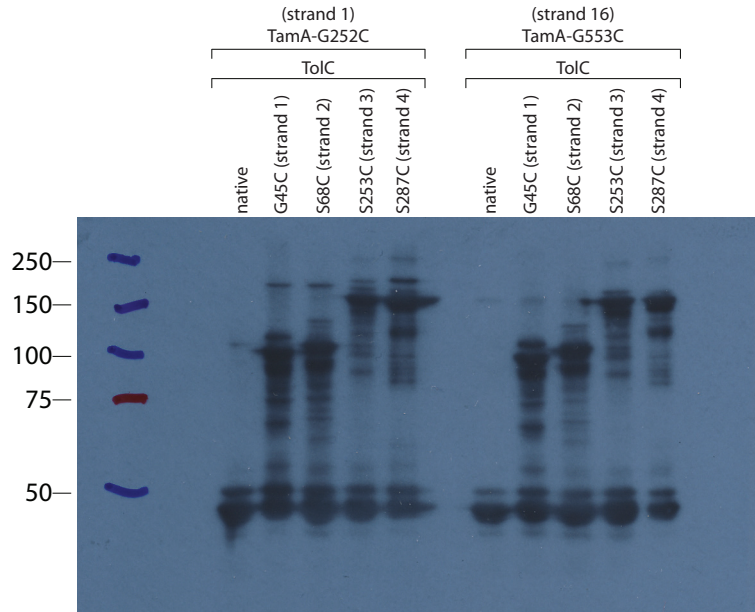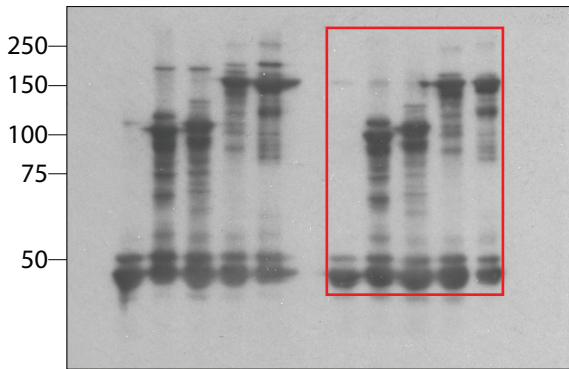

Left panel

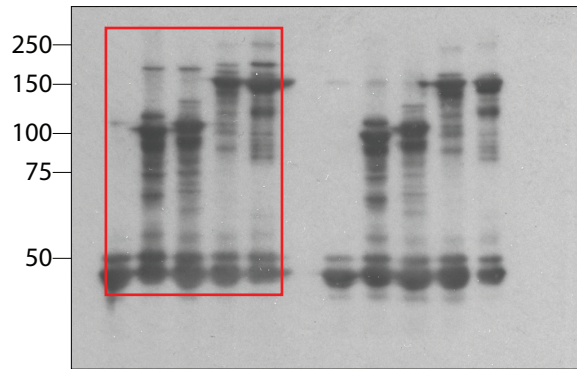

Right panel

Immunoblot #38 - (S5B Fig; batch 1; αPpiD; left and right panels)

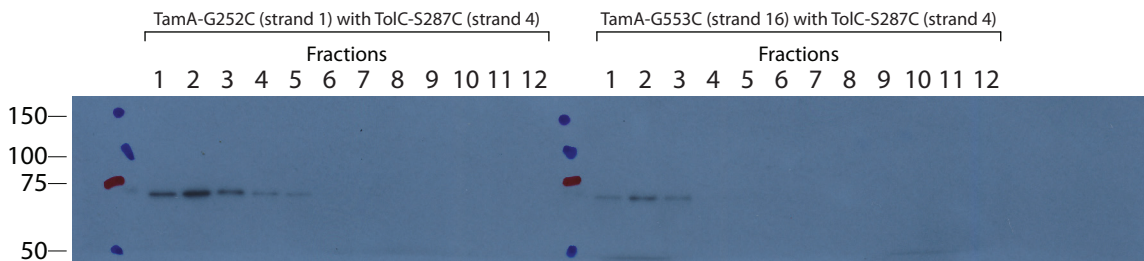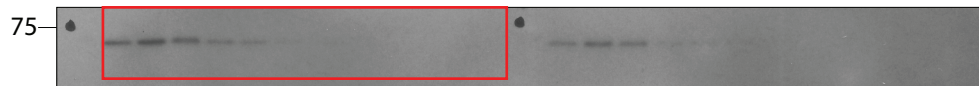

left panel

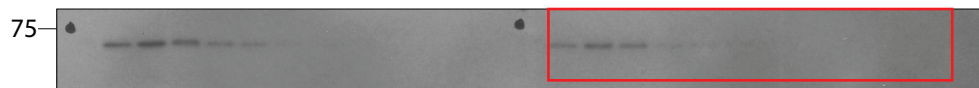

right panel

**Immunoblot #39 - (S5B Fig; batch 1;  $\alpha$ OmpF; left and right panels)**

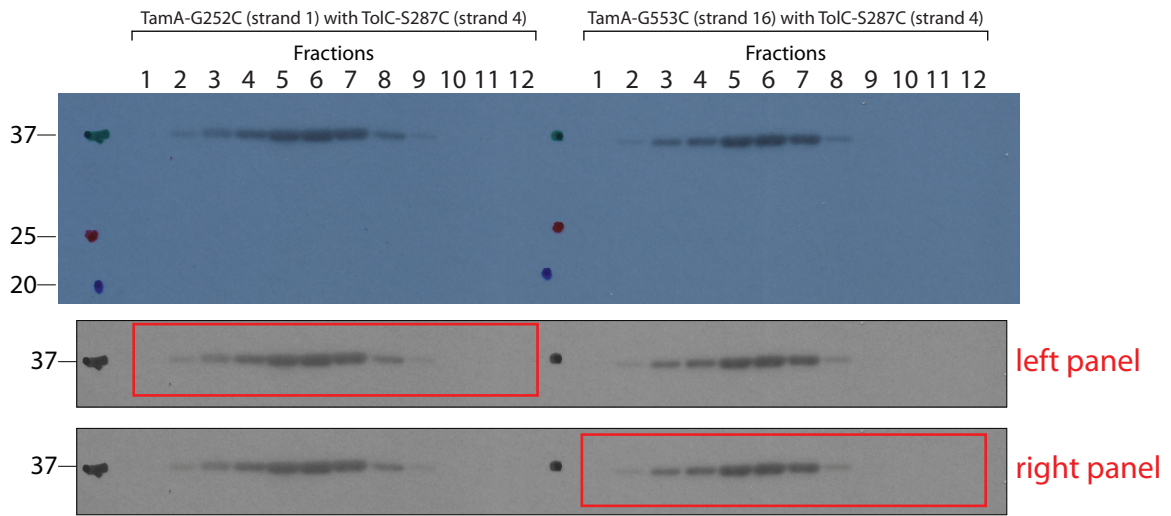

**Immunoblot #40 - (S5B Fig; batch 2;  $\alpha$ PpiD; left and right panels)**

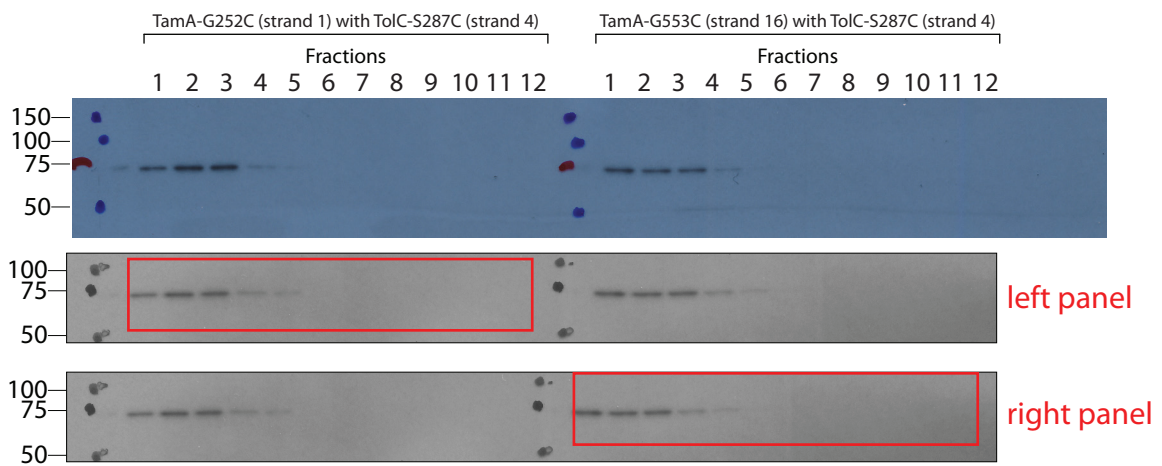

**Immunoblot #41 - (S5B Fig; batch 2;  $\alpha$ OmpF; left and right panels)**

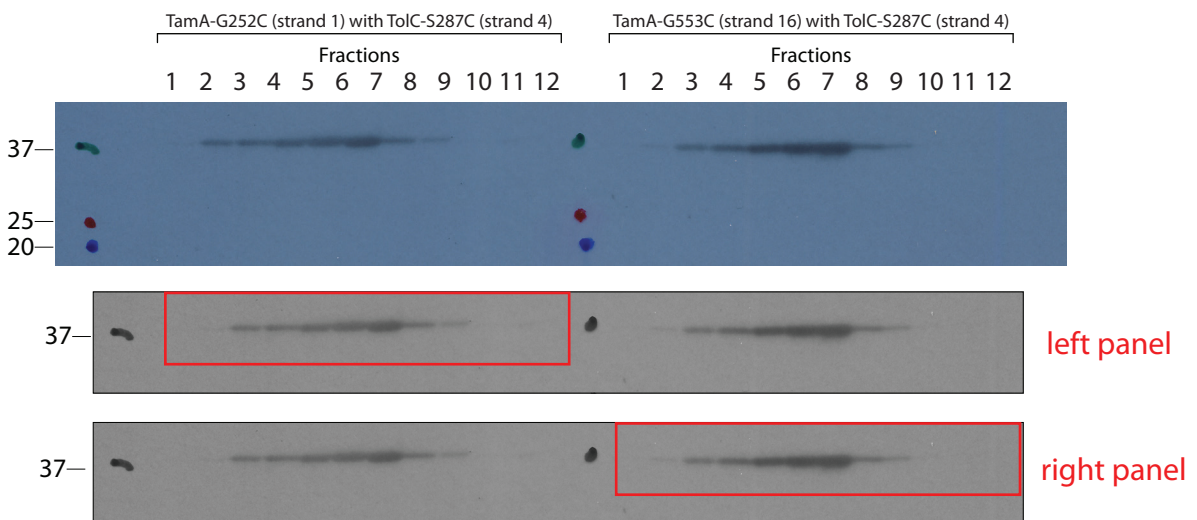

Immunoblot #42 - (S5C Fig; batches 1-2; αTamA)

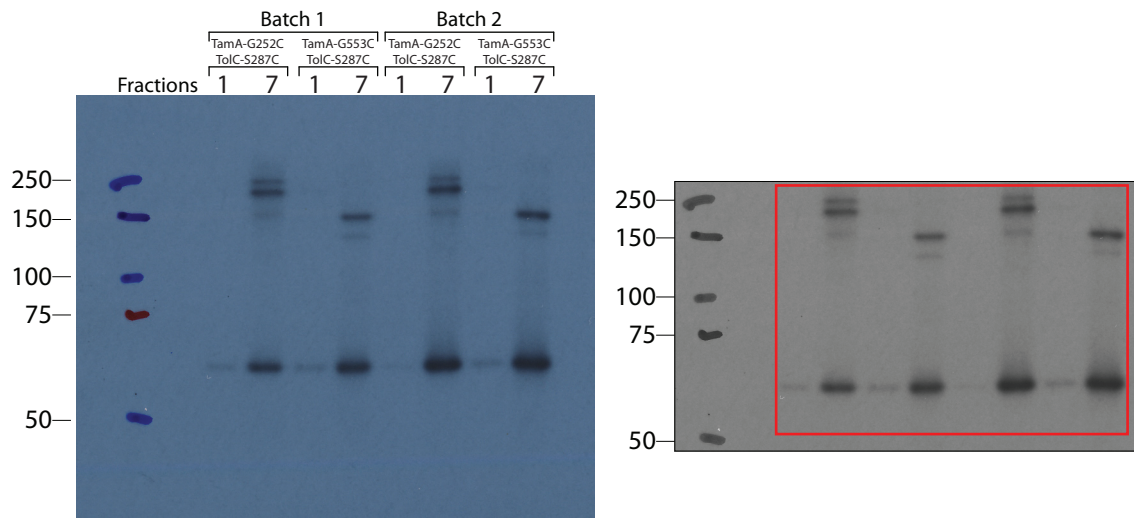

Supplement: pbio.3001523.s017.pdf [file pbio.3001523.s017.pdf]
