# Supplementary material for: A noncanonical chaperone interacts with drug efflux pumps during their assembly into bacterial outer membranes
Source: PubMed Central journal article supplement (PMC8809574; doi:10.1371/journal.pbio.3001523), 2022-01-21
Supplement: pbio.3001523.s016.pdf [file pbio.3001523.s016.pdf]

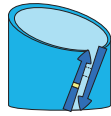

G250C non-reducing  
4/4 biological replicates

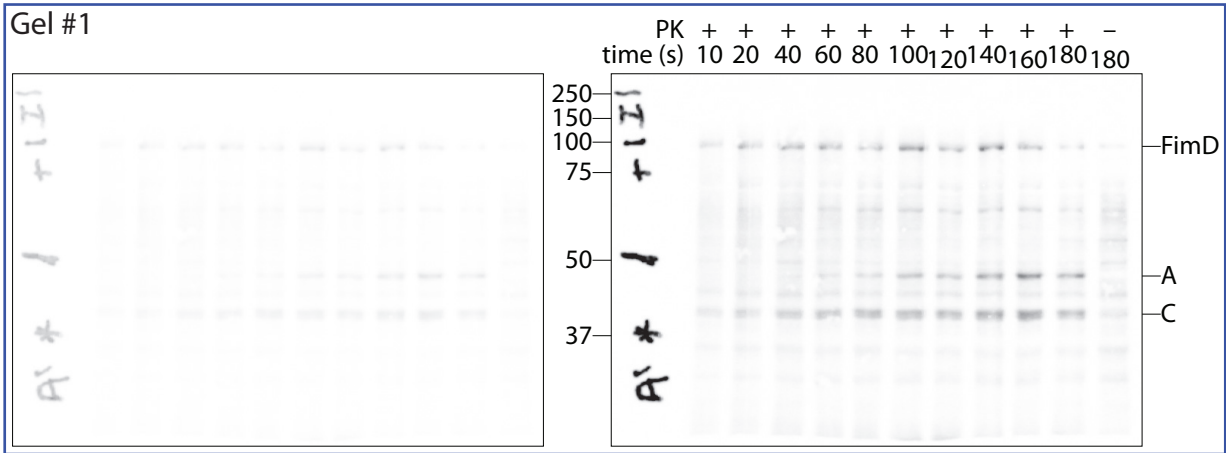

**Gel #2 - (raw image file for Fig. 2d, G250C)**

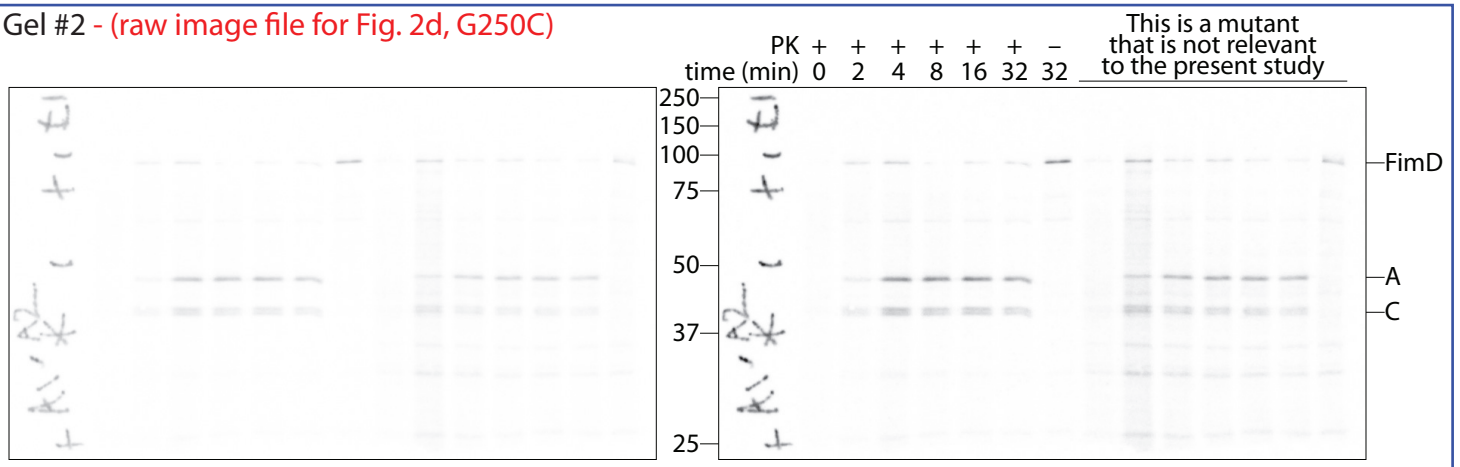

**Gel #3**

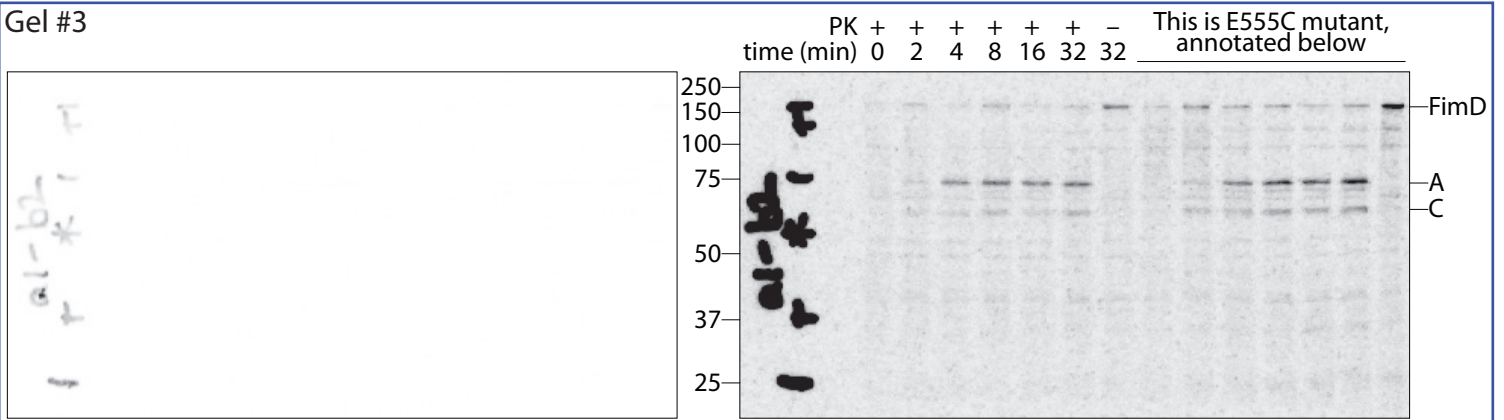

**Gel #4**

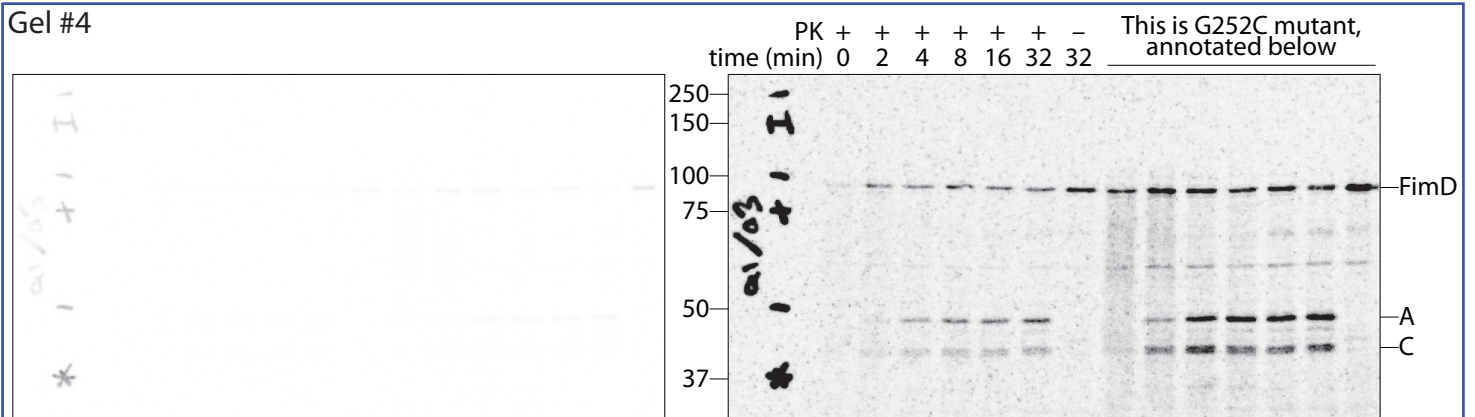

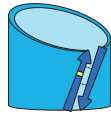

G252C non-reducing  
4/4 biological replicates

Gel #5

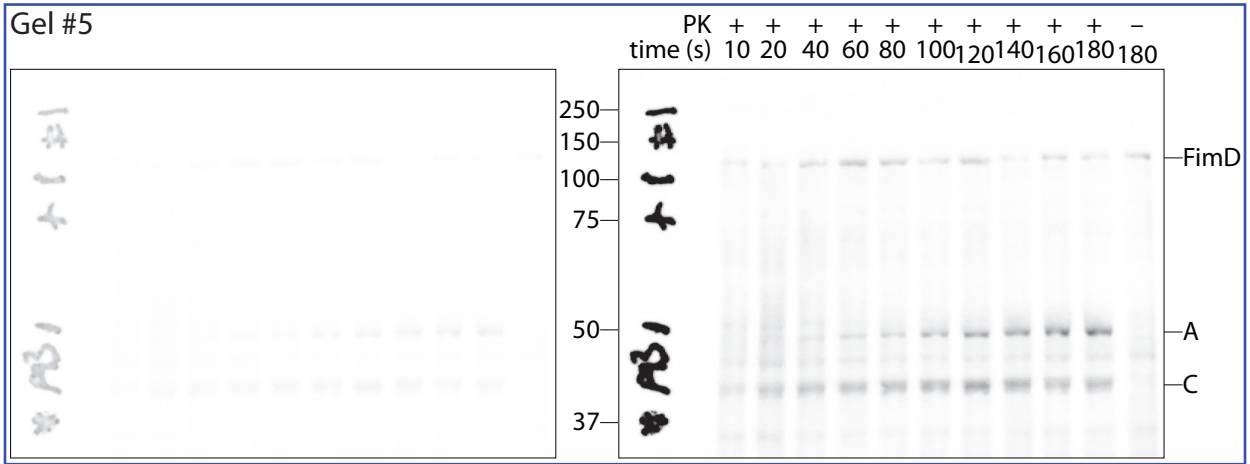

Gel #6

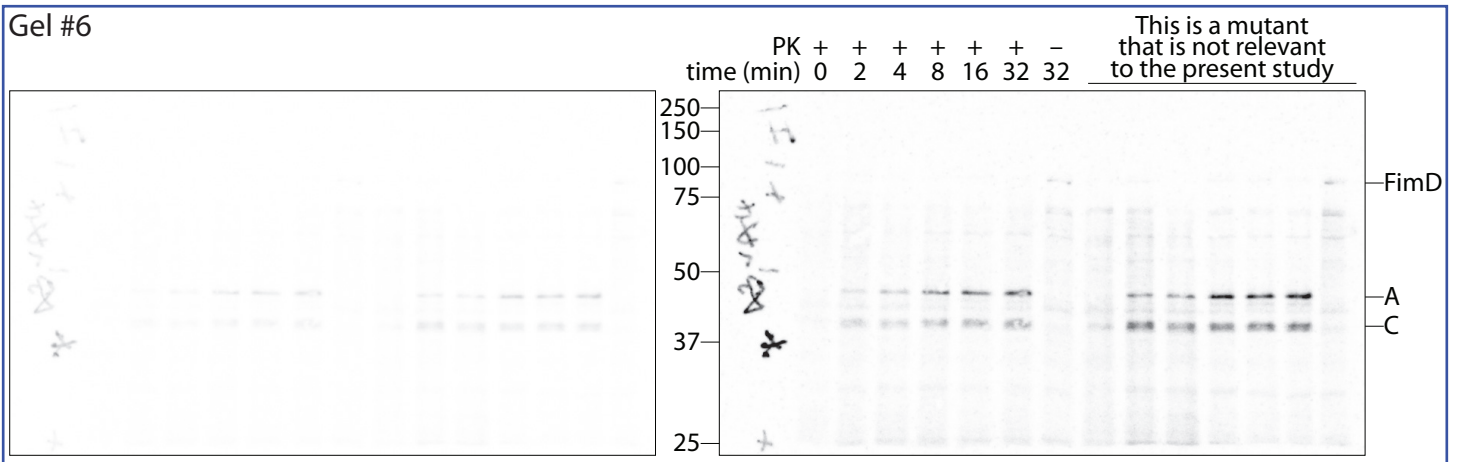

Gel #7

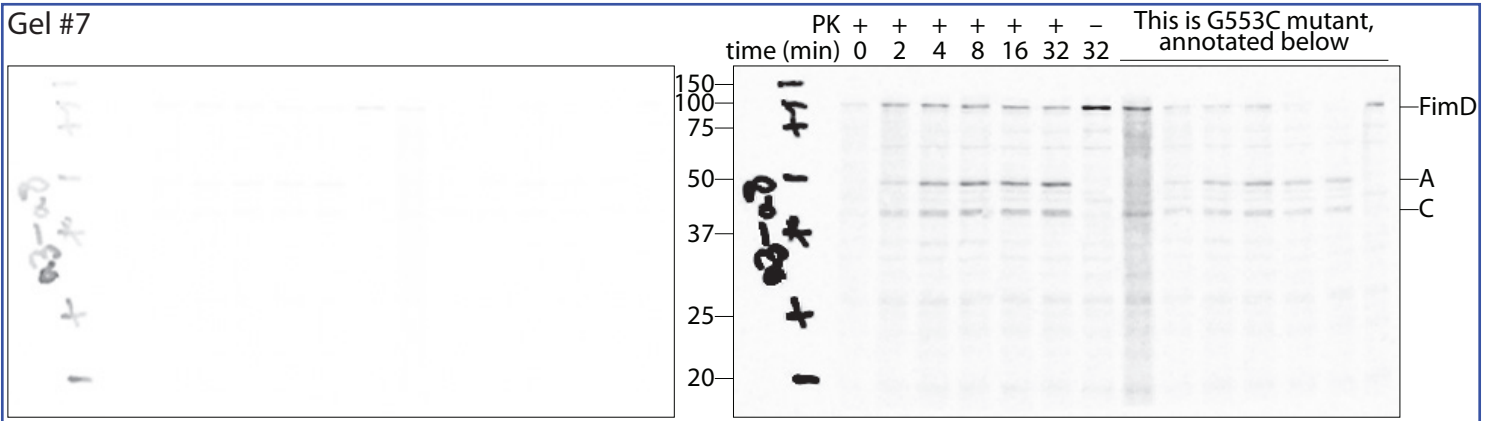

Gel #4 - (raw image file for Fig. 2e, G252C)

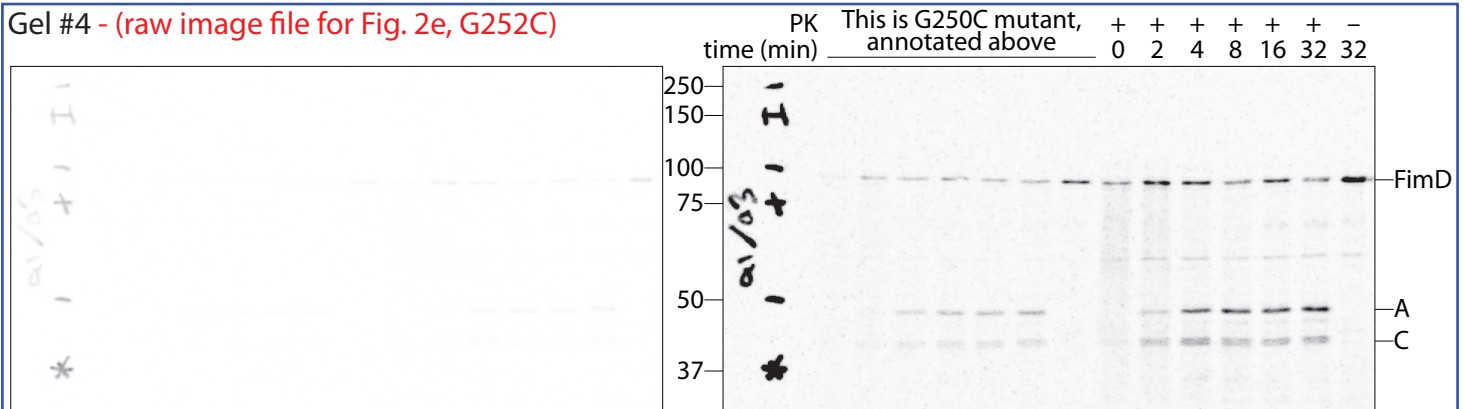

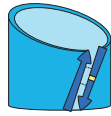

G553C non-reducing  
4/4 biological replicates

Gel #8

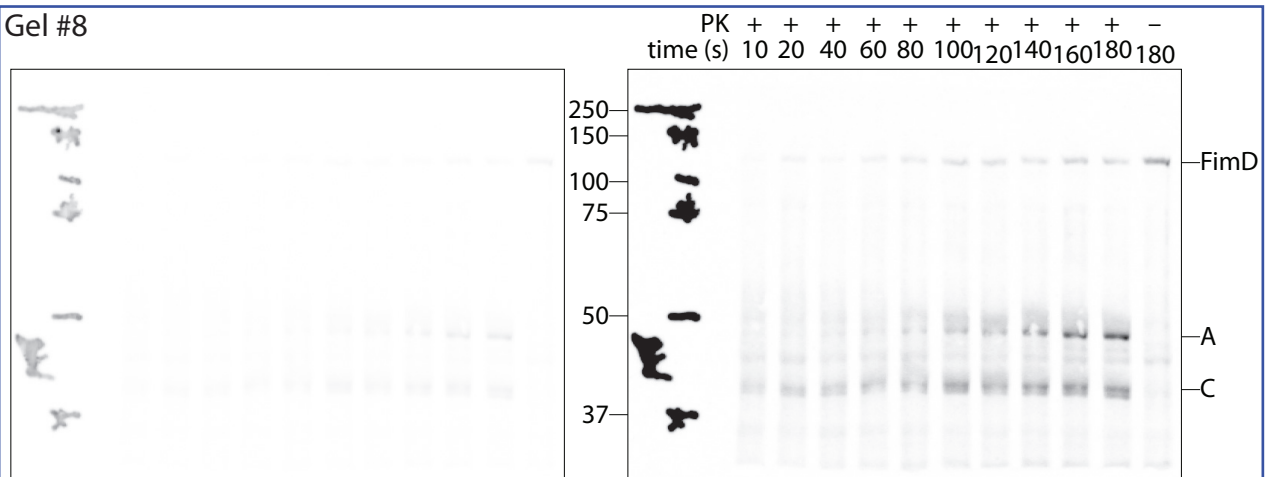

Gel #9

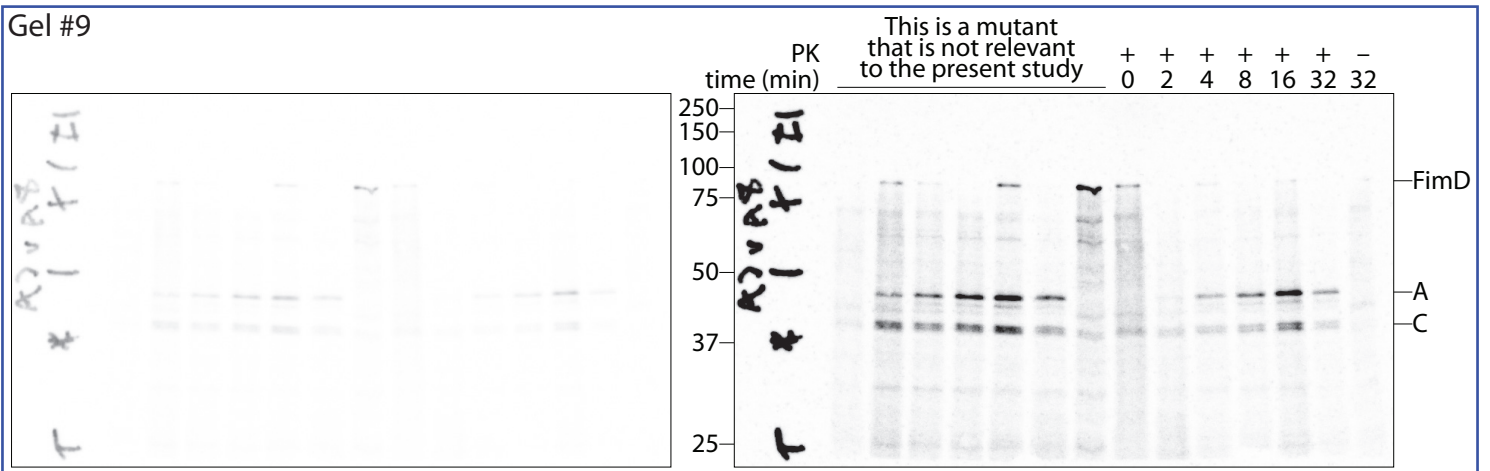

Gel #7

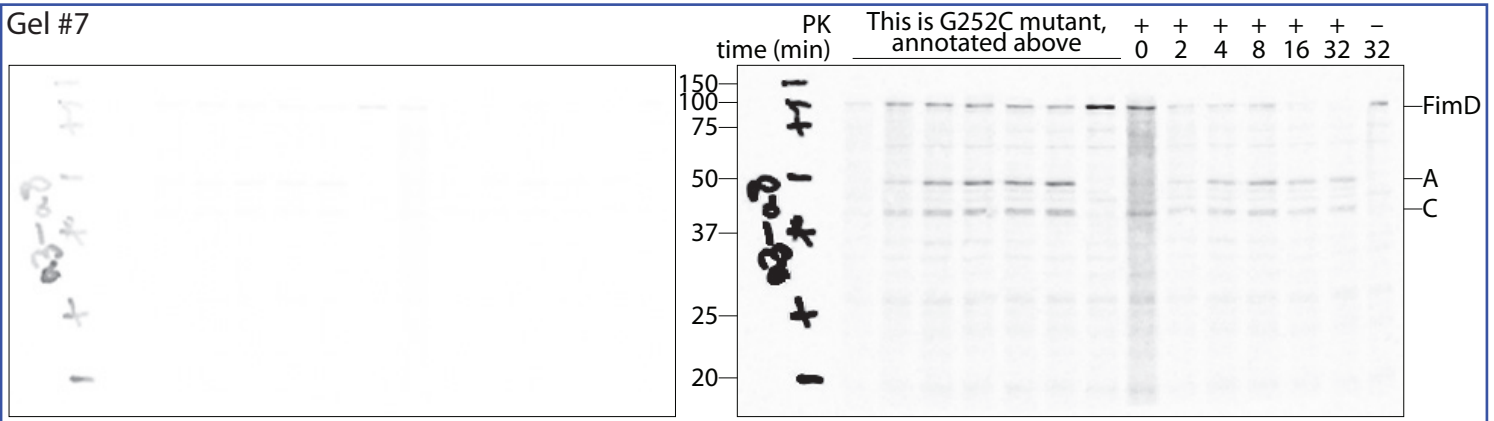

Gel #10 - (raw image file for Fig. 2e, G553C)

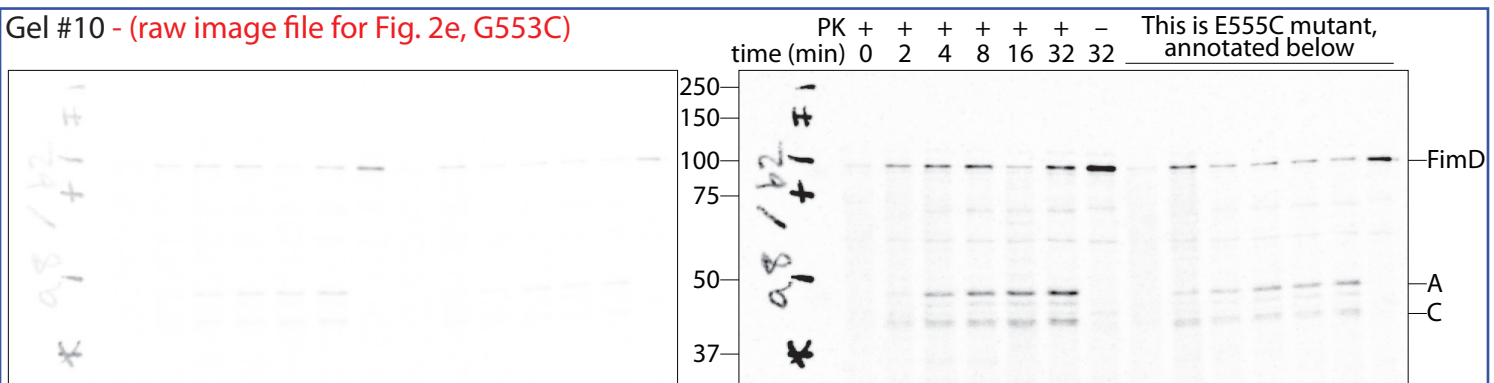

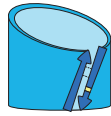

E555C non-reducing  
4/4 biological replicates

Gel #11

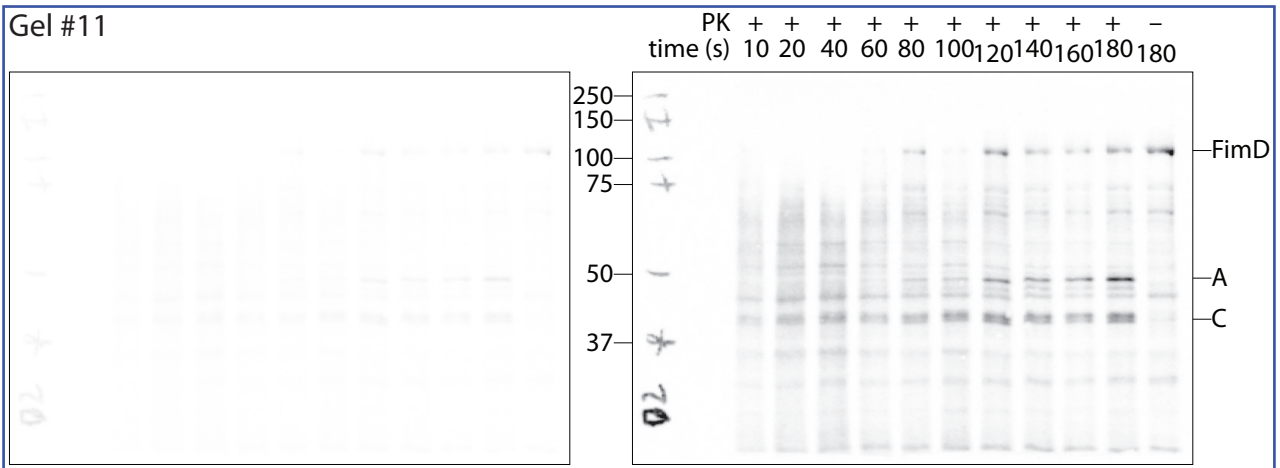

Gel #12 - (raw image file for Fig. 2d, E555C)

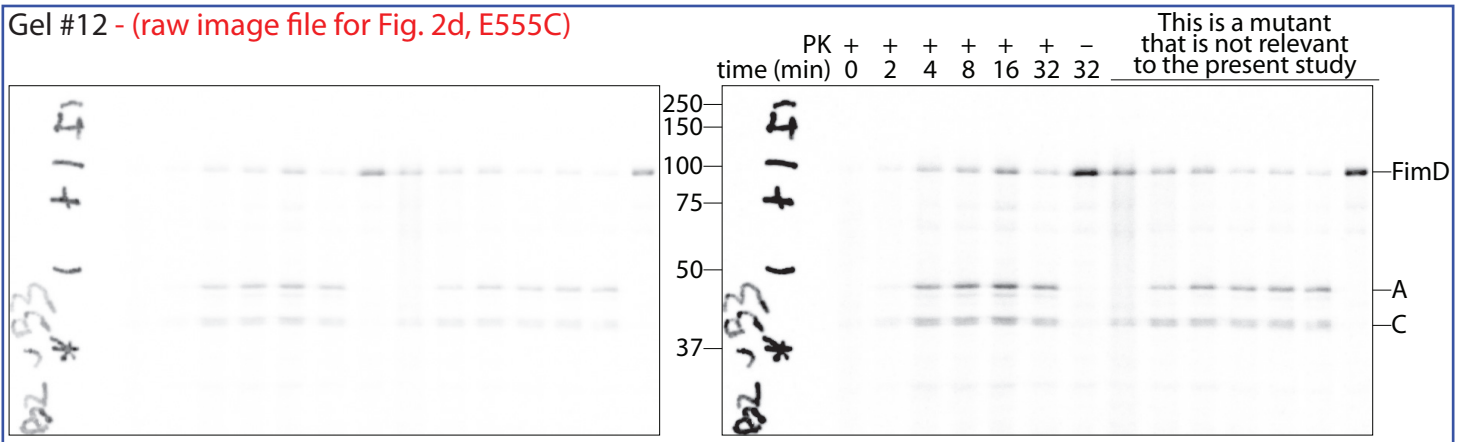

Gel #3

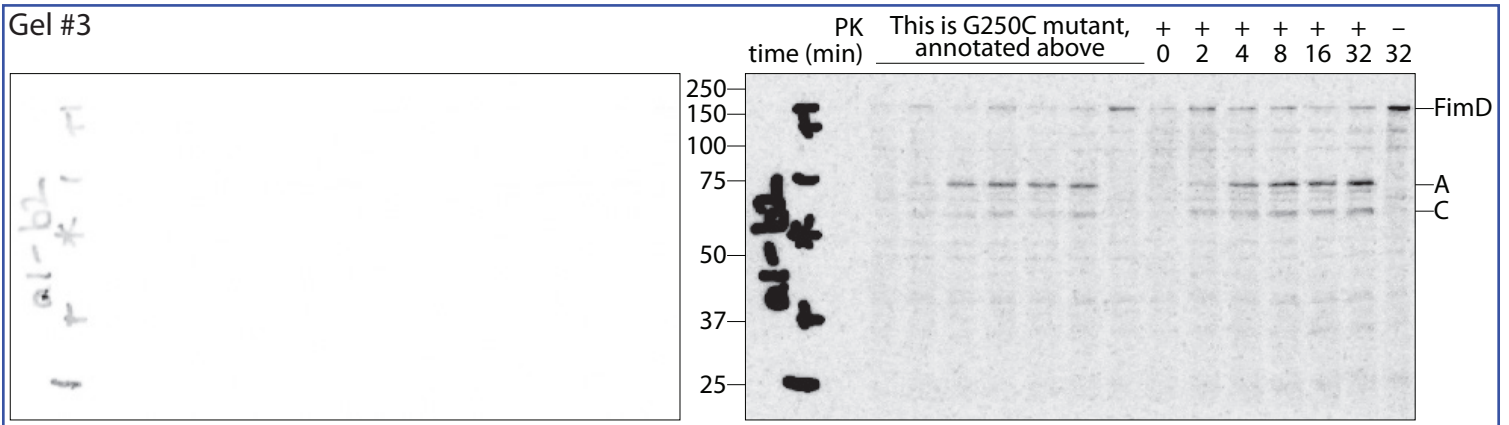

Gel #10

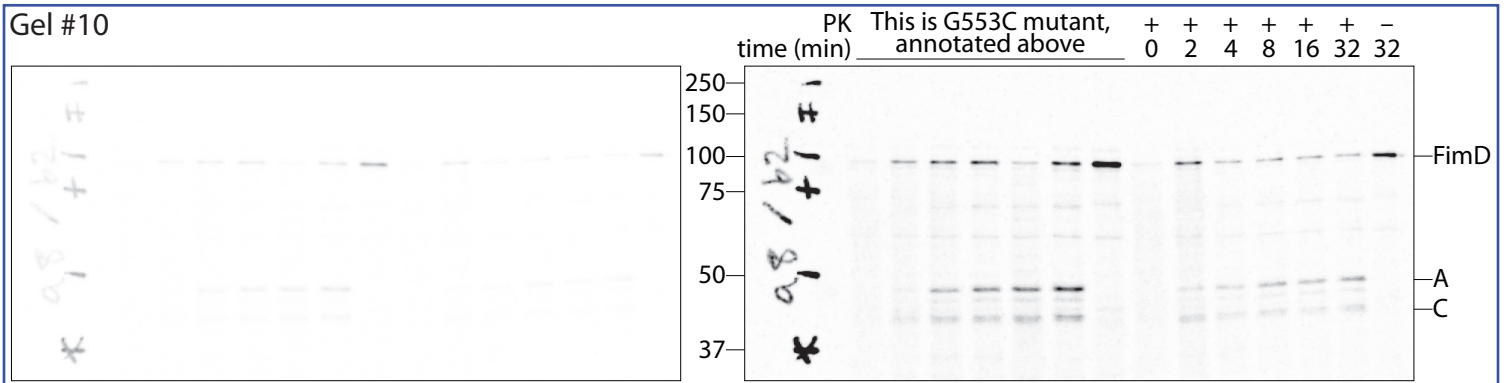

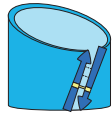

G250C/E555C non-reducing  
3/5 biological replicates (total: 3/5 biological replicates)

Gel #13

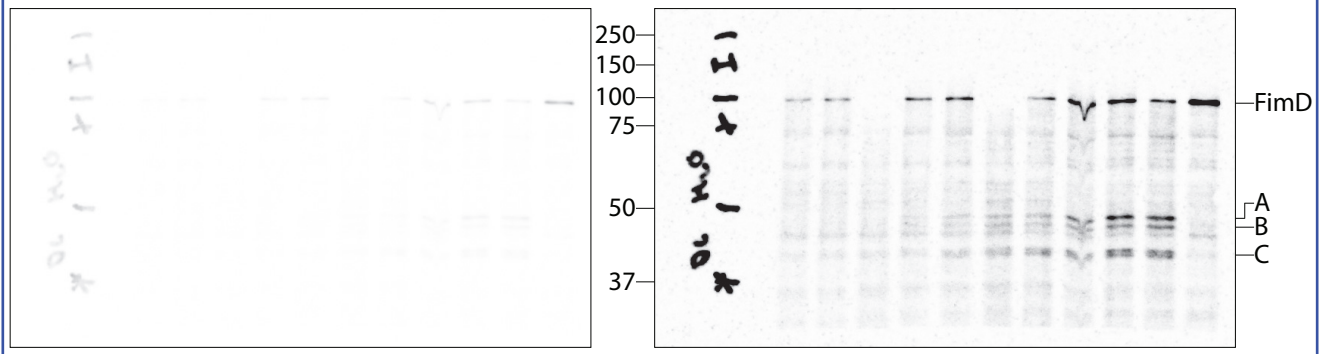

Gel #14 - (raw image file for Fig. 2d,  
G250C/E555C non-reducing)

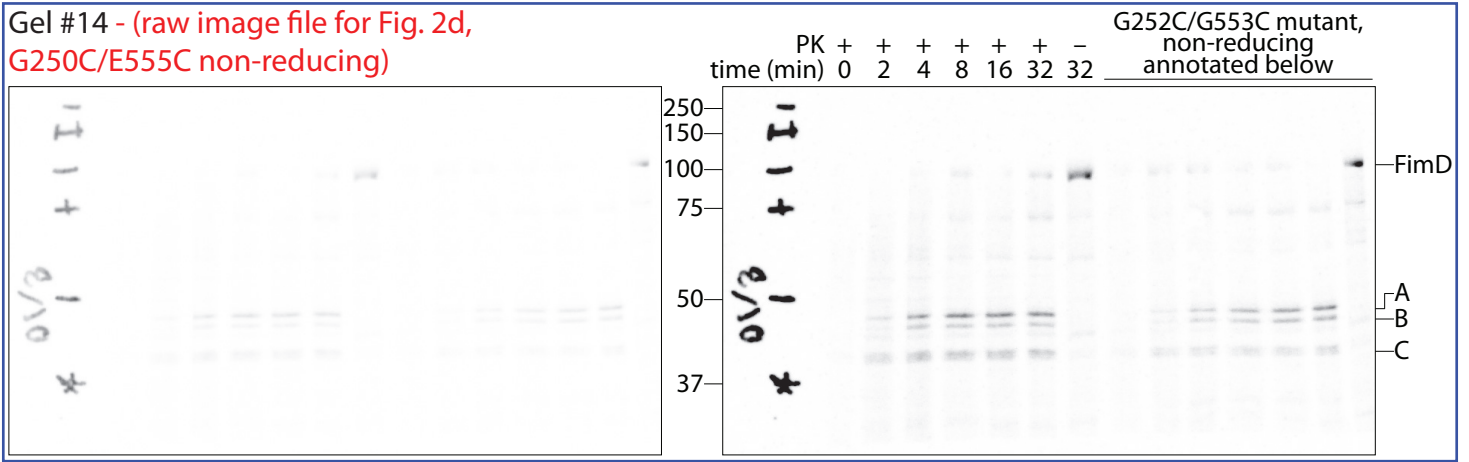

Gel #15

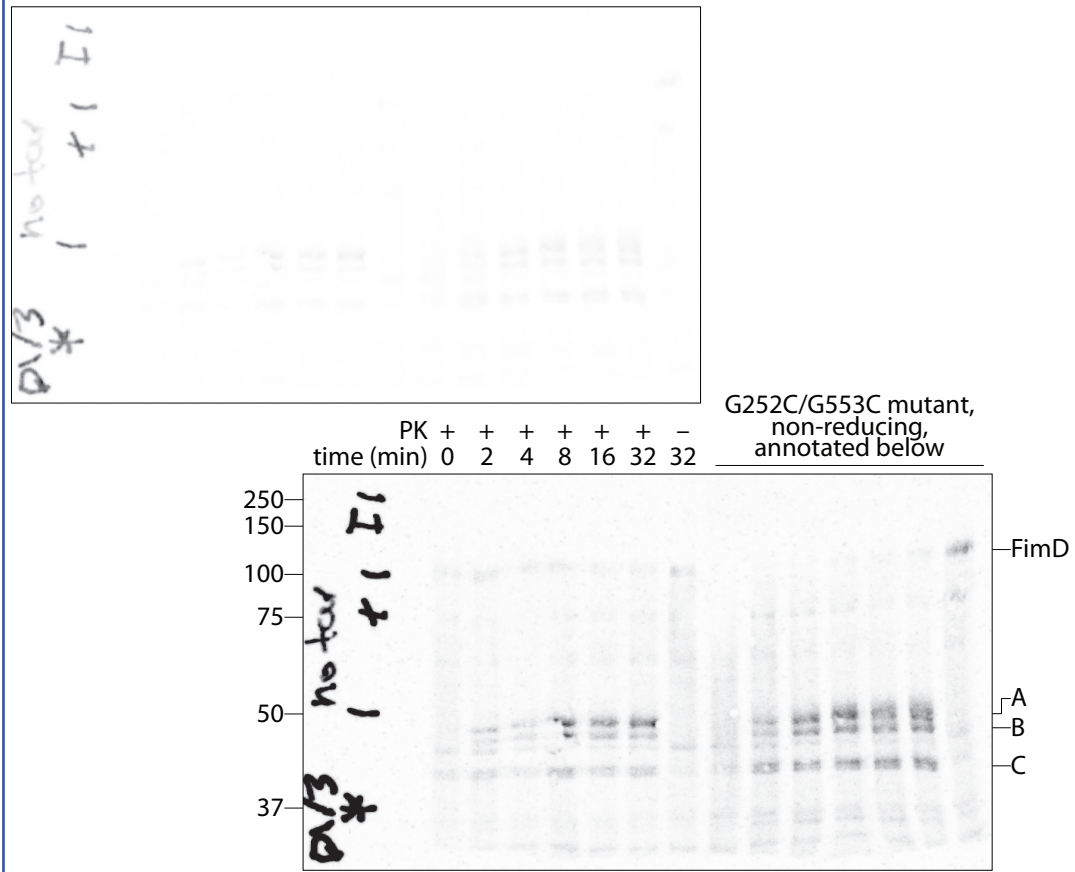

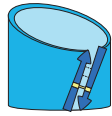

G250C/E555C non-reducing  
2/5 biological replicates (total: 5/5 biological replicates)

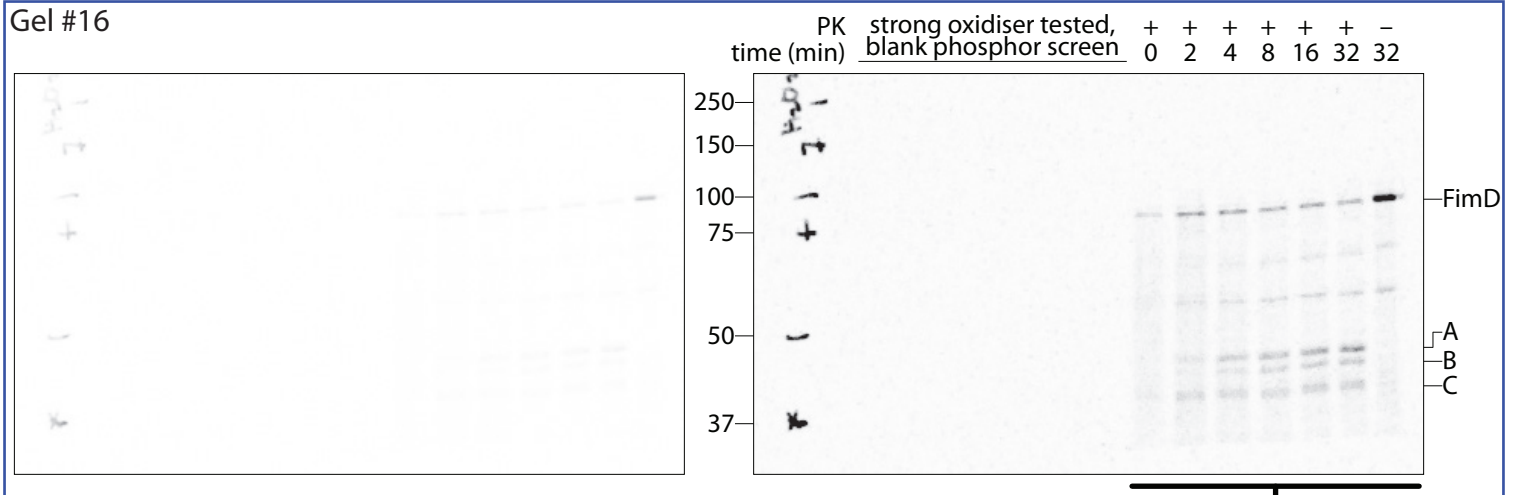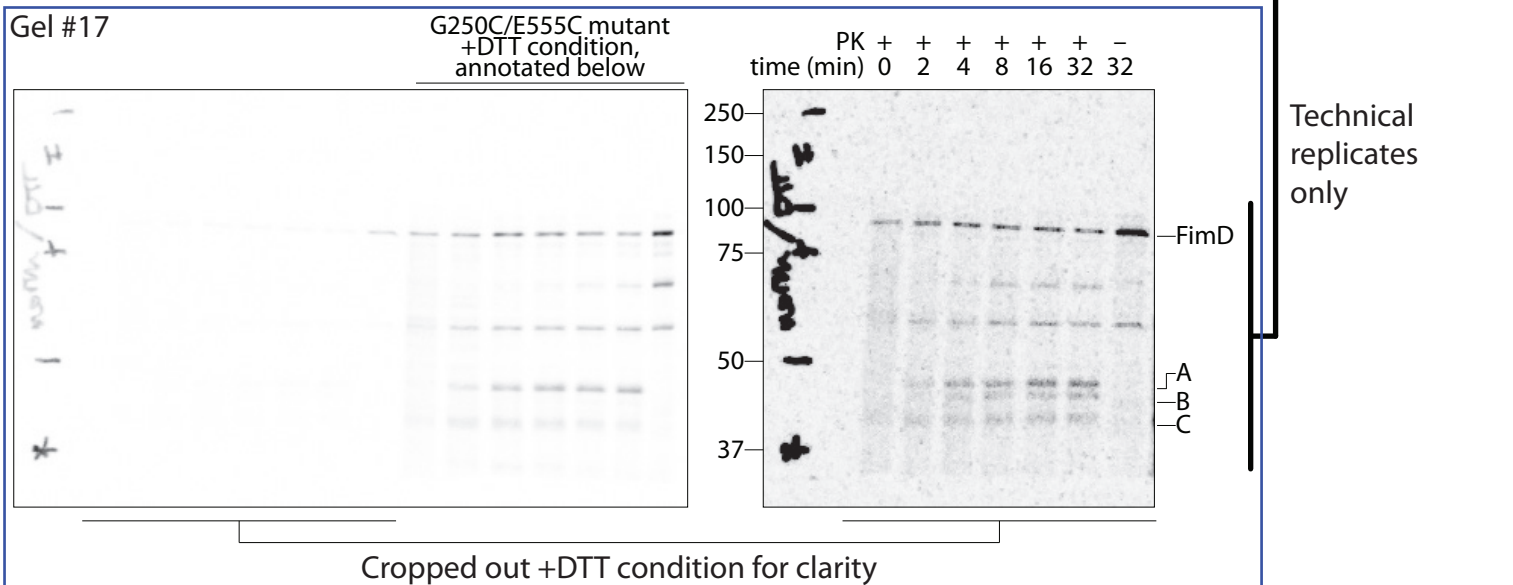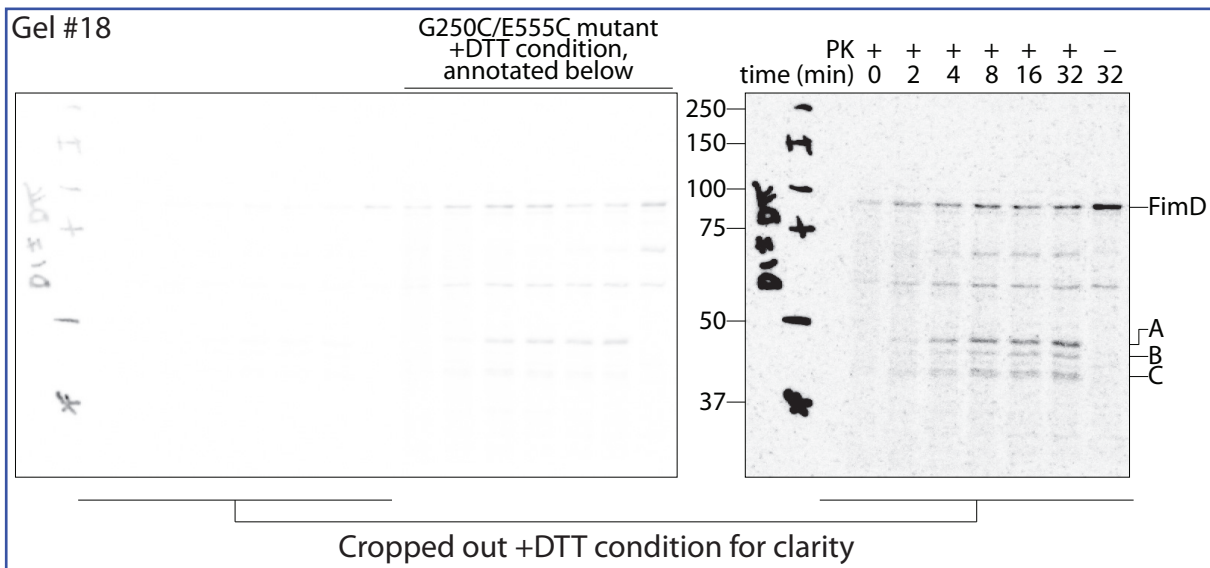

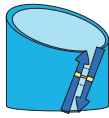

G252C/G553C non-reducing  
3/4 biological replicates (total: 3/4 biological replicates)

Gel #19

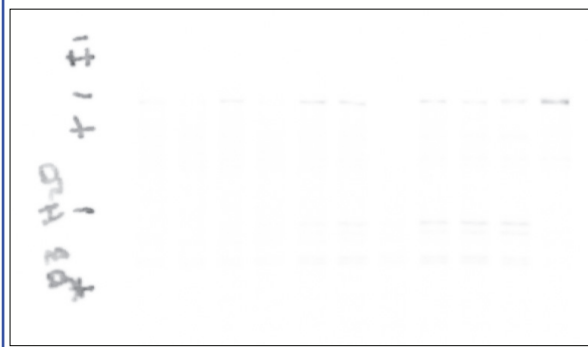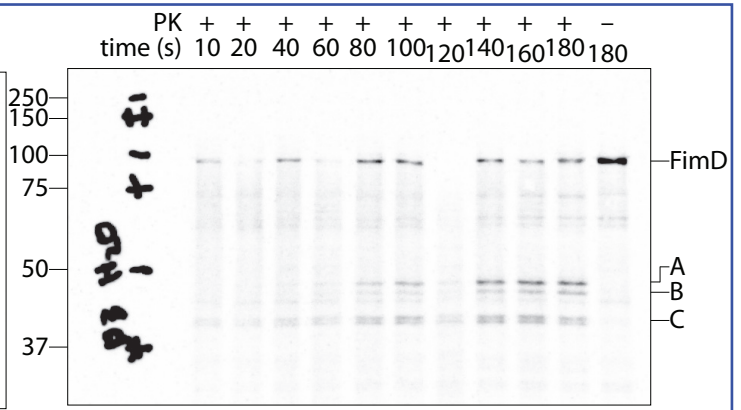

Gel #14

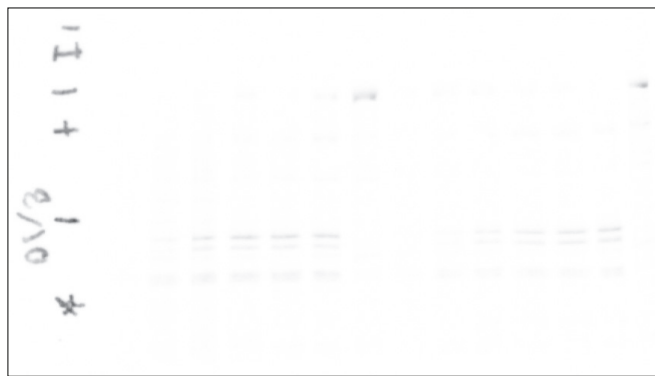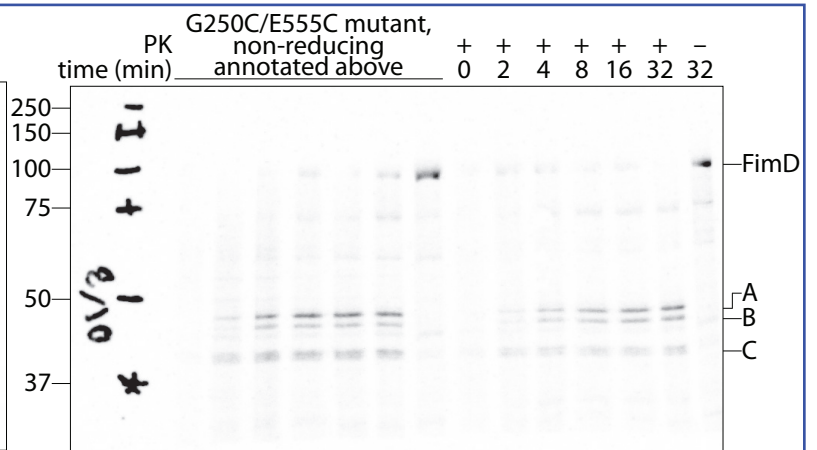

Gel #15

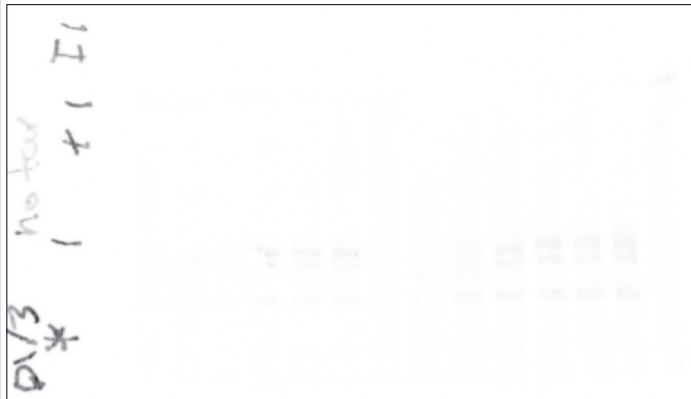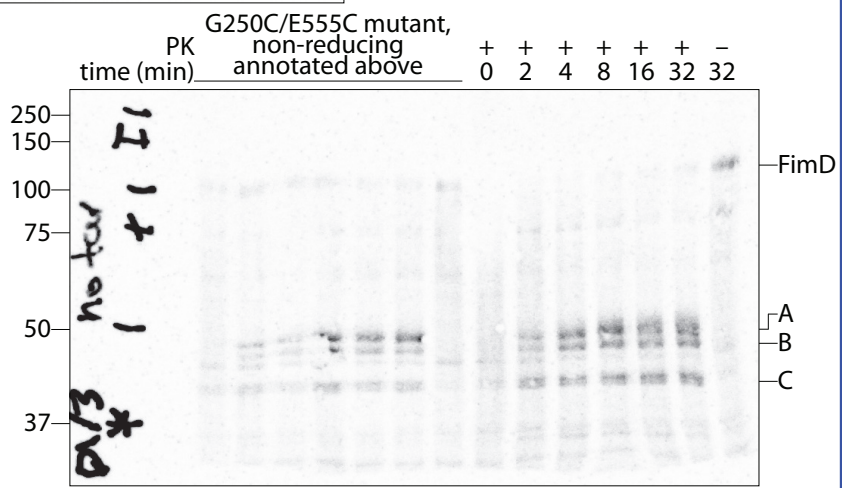

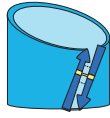

G252C/G553C non-reducing  
1/4 biological replicates (total: 4/4 biological replicates)

Gel #20 - (raw image file for Fig. 2e, G252C/G553C non-reducing)

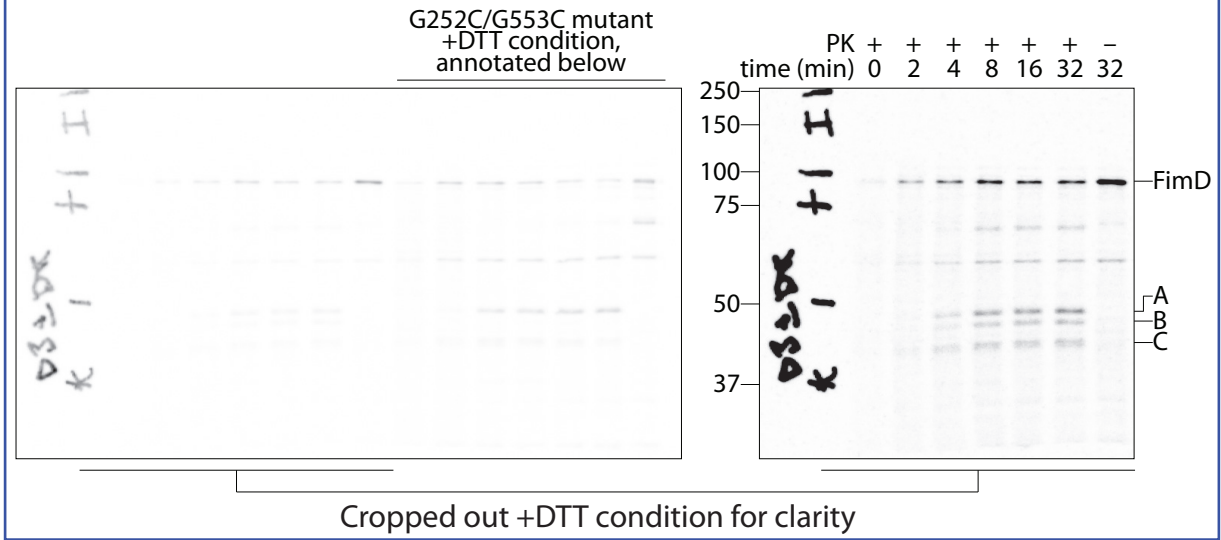



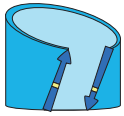

G250C/E555C with 5 mM DTT  
4/4 biological replicates

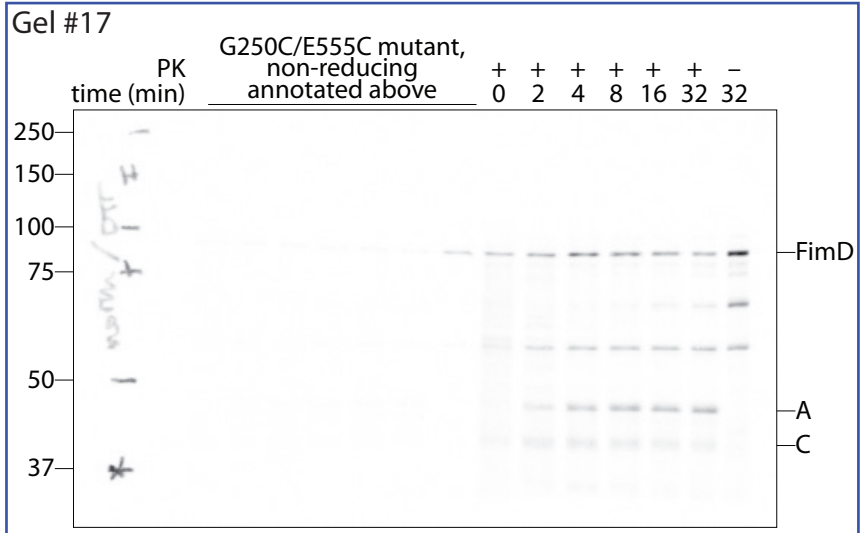

**Gel #18 - (raw image file for Fig. 2d, G250C/E555C non-reducing)**

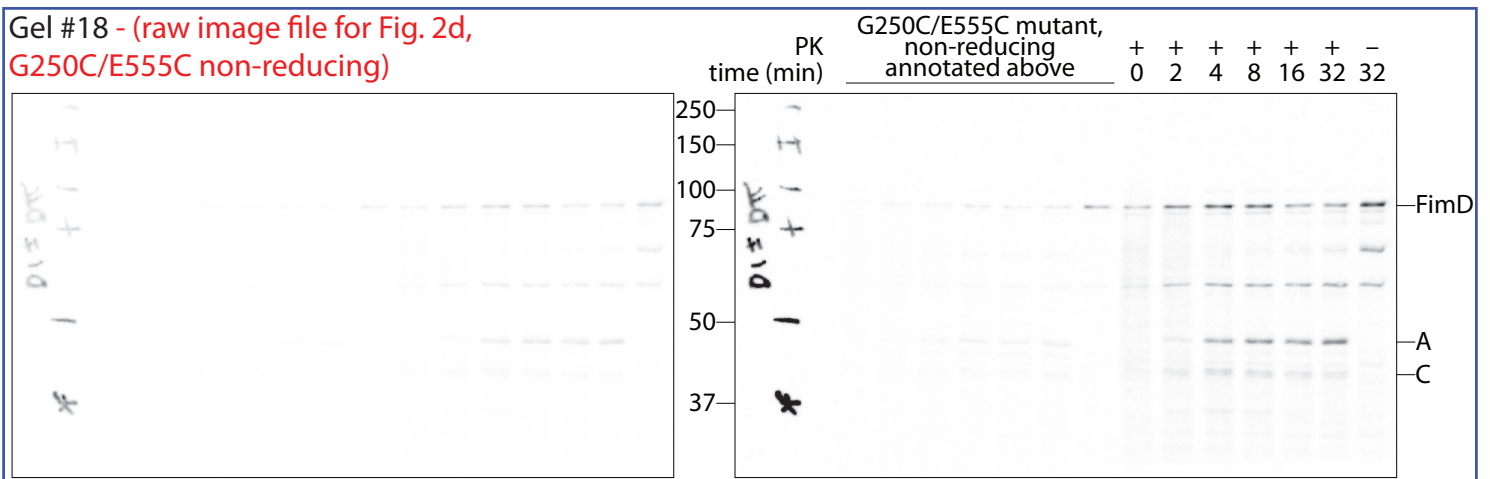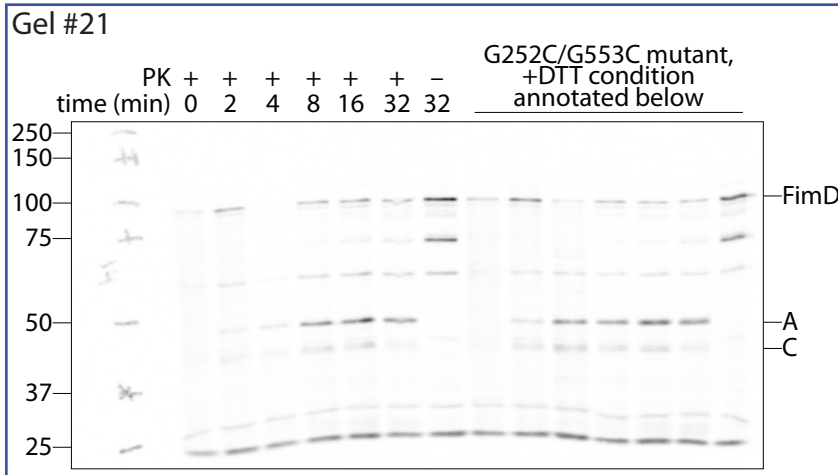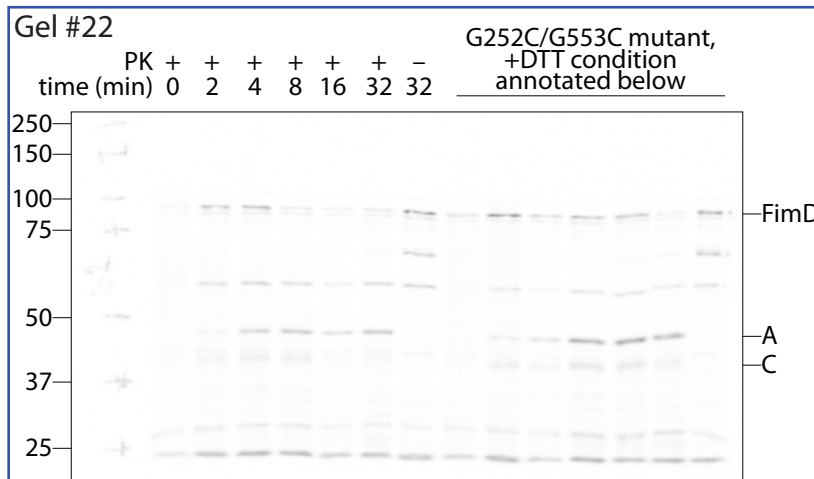



Single timepoints (+PK samples and -PK samples)  
1/3 biological replicates (total: 1/3 biological replicates)

Gel #23 - (raw image file for Fig. S2C)

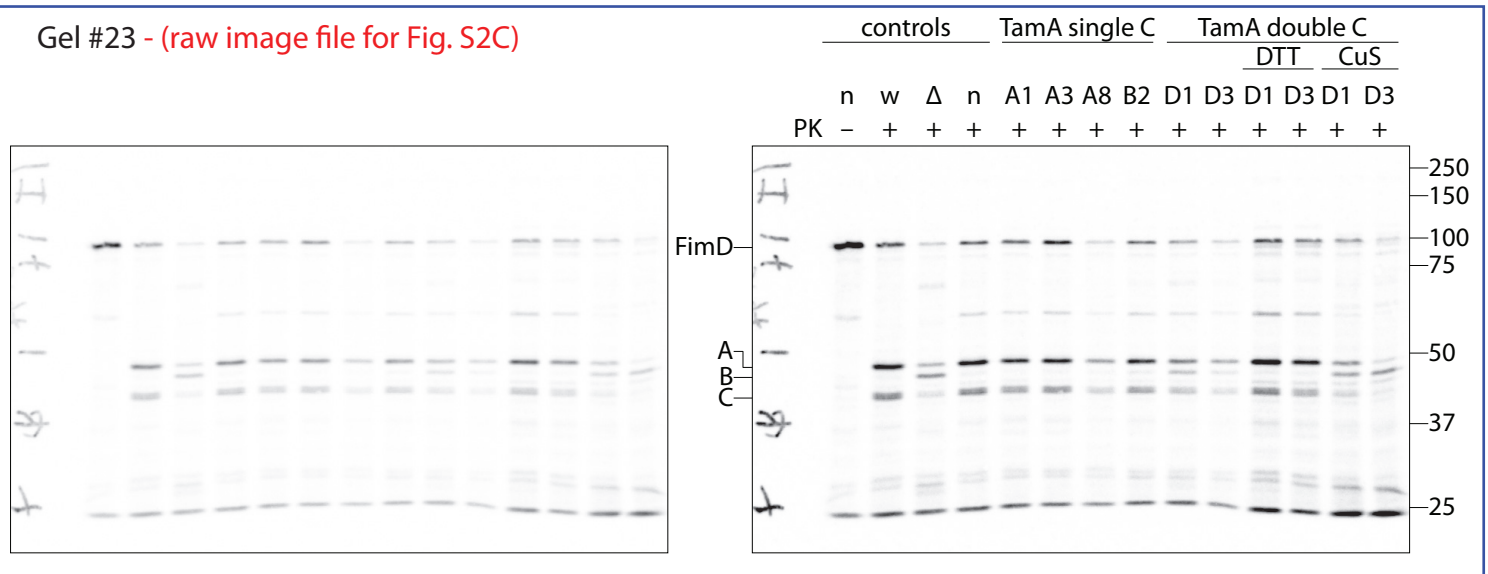

Gel #24 - (raw image file for Fig. S2C)

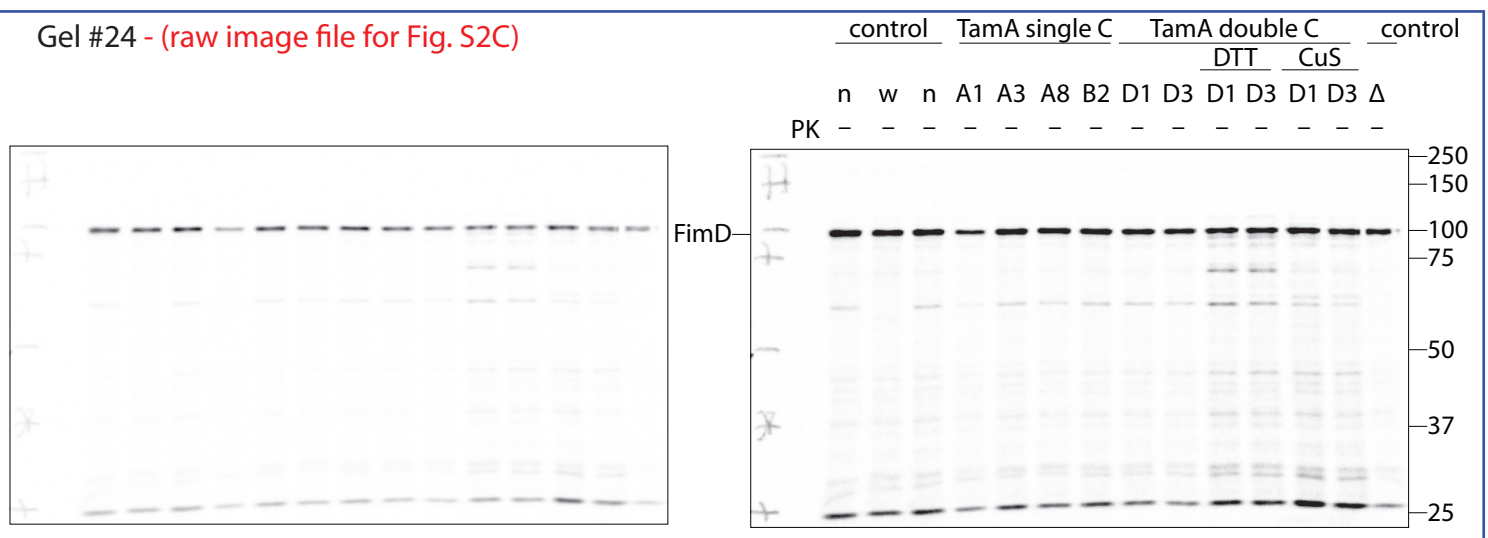

All strains contain pK502 (fimD expression vector)

w = wildtype with pACYCDuet-1 (base expression vector)

$\Delta$  =  $\Delta tamA$  with pACYCDuet-1 (base expression vector)

n =  $\Delta tamA$  with pCJS69 (*tamA* expression vector)

A1 =  $\Delta tamA$  with pCJS69 (*tamA*-G250C expression vector)

A3 =  $\Delta tamA$  with pCJS69 (*tamA*-G252C expression vector)

A8 =  $\Delta tamA$  with pCJS69 (*tamA*-G553C expression vector)

B2 =  $\Delta tamA$  with pCJS69 (*tamA*-E555C expression vector)

D1 =  $\Delta tamA$  with pCJS69 (*tamA*-G250C-E555C expression vector)

D3 =  $\Delta tamA$  with pCJS69 (*tamA*-G252C-G553C expression vector)

Unless otherwise indicated (by "DTT" or "CuS"), samples were subjected to normal pulse chase

DTT = samples were supplemented with 5 mM DTT

CuS = samples were supplemented with 100  $\mu$ M CuSO<sub>4</sub>

Single timepoints (+PK samples and -PK samples)  
 1/3 biological replicates (total: 2/3 biological replicates)

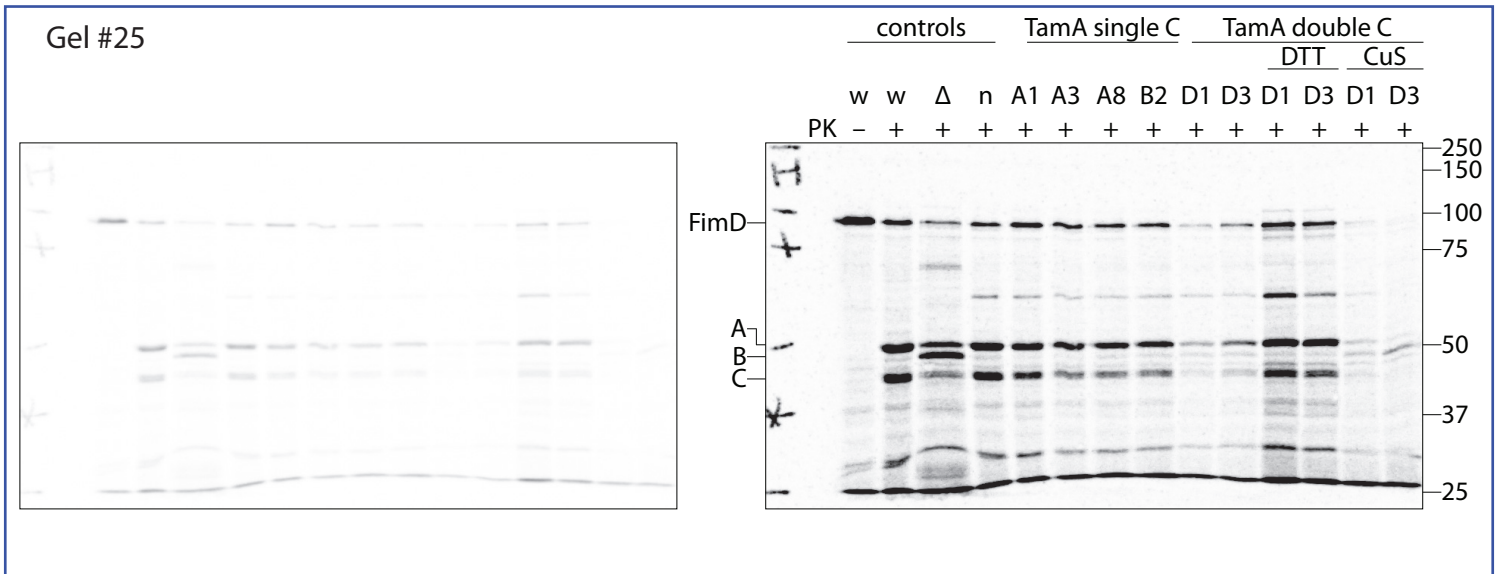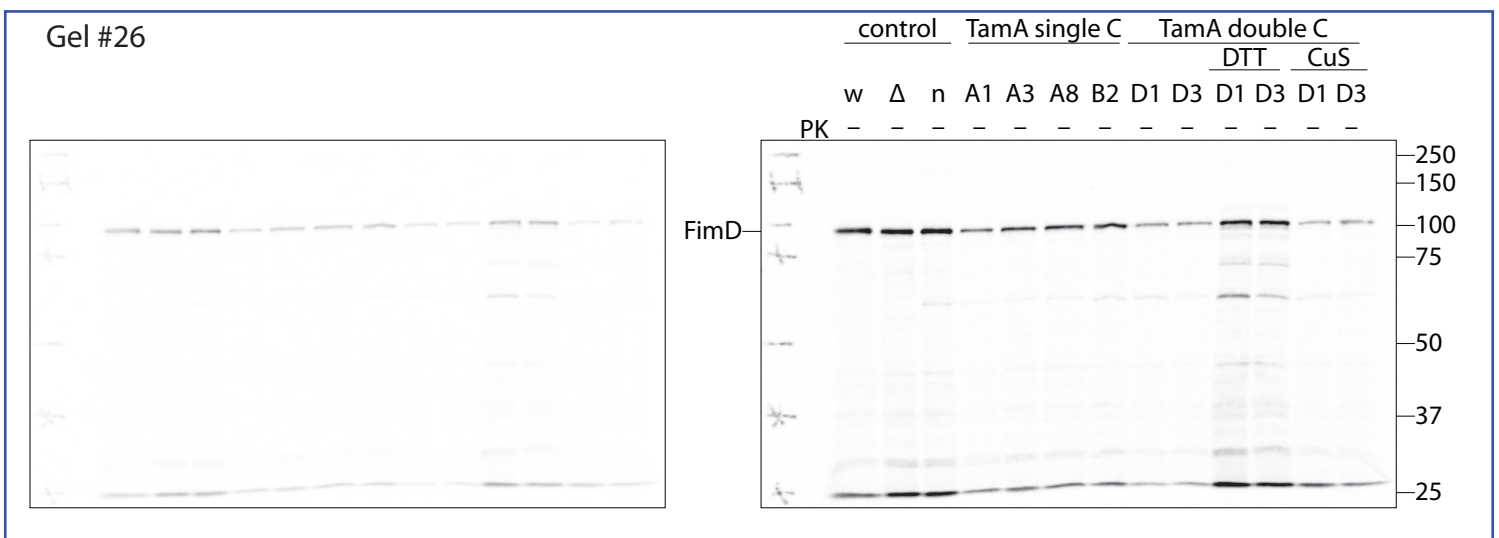

All strains contain pK502 (fimD expression vector)

w = wildtype with pACYCDuet-1 (base expression vector)

$\Delta$  =  $\Delta tamA$  with pACYCDuet-1 (base expression vector)

n =  $\Delta tamA$  with pCJS69 (*tamA* expression vector)

A1 =  $\Delta tamA$  with pCJS69 (*tamA*-G250C expression vector)

A3 =  $\Delta tamA$  with pCJS69 (*tamA*-G252C expression vector)

A8 =  $\Delta tamA$  with pCJS69 (*tamA*-G553C expression vector)

B2 =  $\Delta tamA$  with pCJS69 (*tamA*-E555C expression vector)

D1 =  $\Delta tamA$  with pCJS69 (*tamA*-G250C-E555C expression vector)

D3 =  $\Delta tamA$  with pCJS69 (*tamA*-G252C-G553C expression vector)

Unless otherwise indicated (by "DTT" or "CuS"), samples were subjected to normal pulse chase

DTT = samples were supplemented with 5 mM DTT

CuS = samples were supplemented with 100  $\mu$ M CuSO<sub>4</sub>

Single timepoints (+PK samples and -PK samples)  
 1/3 biological replicates (total: 3/3 biological replicates)

Gel #27

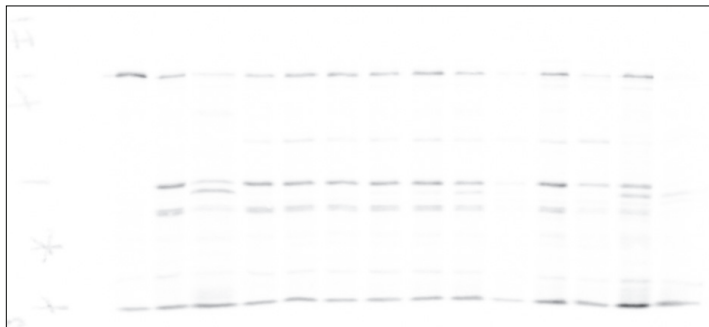

| controls |   | TamA single C |   |    |    | TamA double C |    |    |    |    |    |    |    |
|----------|---|---------------|---|----|----|---------------|----|----|----|----|----|----|----|
| w        | w | $\Delta$      | n | A1 | A3 | A8            | B2 | D1 | D3 | D1 | D3 | D1 | D3 |
| PK       |   |               |   |    |    |               |    |    |    |    |    |    |    |
| -        | + | +             | + | +  | +  | +             | +  | +  | +  | +  | +  | +  | +  |

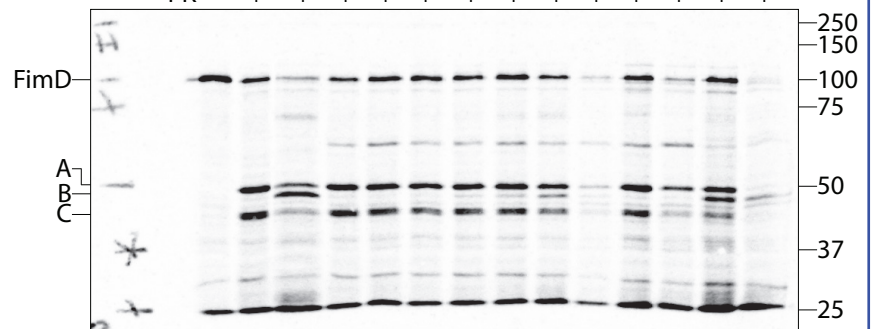

Gel #28

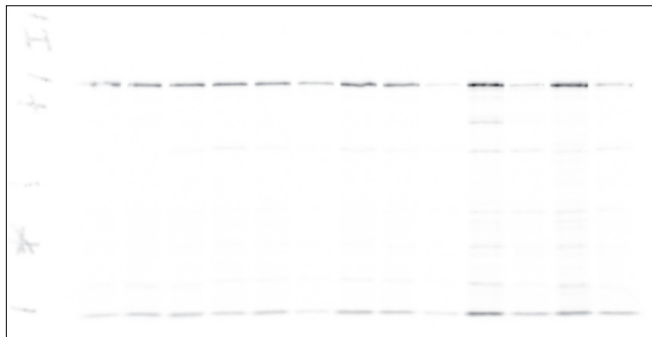

| control |          | TamA single C |    |    |    | TamA double C |    |    |    |    |    |    |   |
|---------|----------|---------------|----|----|----|---------------|----|----|----|----|----|----|---|
| w       | $\Delta$ | n             | A1 | A3 | A8 | B2            | D1 | D3 | D1 | D3 | D1 | D3 |   |
| PK      |          |               |    |    |    |               |    |    |    |    |    |    |   |
| -       | -        | -             | -  | -  | -  | -             | -  | -  | -  | -  | -  | -  | - |

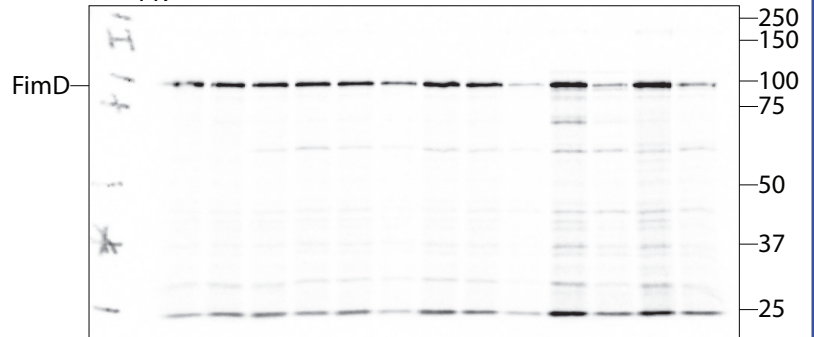

All strains contain pKS02 (fimD expression vector)

w = wildtype with pACYCDuet-1 (base expression vector)

$\Delta$  =  $\Delta tamA$  with pACYCDuet-1 (base expression vector)

n =  $\Delta tamA$  with pCJS69 (*tamA* expression vector)

A1 =  $\Delta tamA$  with pCJS69 (*tamA*-G250C expression vector)

A3 =  $\Delta tamA$  with pCJS69 (*tamA*-G252C expression vector)

A8 =  $\Delta tamA$  with pCJS69 (*tamA*-G553C expression vector)

B2 =  $\Delta tamA$  with pCJS69 (*tamA*-E555C expression vector)

D1 =  $\Delta tamA$  with pCJS69 (*tamA*-G250C-E555C expression vector)

D3 =  $\Delta tamA$  with pCJS69 (*tamA*-G252C-G553C expression vector)

Unless otherwise indicated (by "DTT" or "CuS"), samples were subjected to normal pulse chase

DTT = samples were supplemented with 5 mM DTT

CuS = samples were supplemented with 100  $\mu$ M CuSO<sub>4</sub>
